# Supplementary material
Source: publisher figshare collection journal article supplement (https://acs.figshare.com/ndownloader/files/4372147)
Supplement: Supplementary file 1 [file 4372147]

## Supporting Information for

### Potent Antitumor Mimetics of Annonaceous Acetogenins Embedded with an Aromatic Moiety in the Left Hydrocarbon Chain Part

Qicai Xiao,<sup>†</sup> Yongqiang Liu,<sup>#</sup> Yatao Qiu,<sup>†</sup> Guangbiao Zhou,<sup>#</sup> Chan Mao,<sup>‡</sup> Zheng Li,<sup>Φ</sup> Zhu-Jun Yao,<sup>‡\*</sup> Sheng Jiang<sup>†\*</sup>

<sup>†</sup>Laboratory of Regenerative Biology, Guangzhou Institute of Biomedicine and Health, Chinese Academy of Sciences, Guangzhou 510530, China

<sup>#</sup>Laboratory of Molecular Carcinogenesis and Targeted Therapy for Cancer, State Key Laboratory of Biomembrane and Membrane Biotechnology, Institute of Zoology, Chinese Academy of Sciences, Beijing, 100101, China

<sup>‡</sup>School of Chemistry and Chemical Engineering, Nanjing National Laboratory of Microstructures, Nanjing University, 22 Hankou Road, Nanjing 210093, China

<sup>Φ</sup>Department of Radiology, the Methodist Hospital Research Institute, Houston TX 77030, USA

#### List of Contents

1. Chemistry (Page S1-S4)
2. RP-HPLC Data of compounds **2-8** (page S4).
3. Copies of <sup>1</sup>H and <sup>13</sup>C NMR (page S5-S76)

---

\* [jiang\\_sheng@gibh.ac.cn](mailto:jiang_sheng@gibh.ac.cn); or [yaoz@nju.edu.cn](mailto:yaoz@nju.edu.cn)

## 1. Chemistry

**General Experimental Methods:**  $^1\text{H}$  NMR and  $^{13}\text{C}$  NMR spectra were recorded on Bruker Avance ARX- 400 (or Bruker Avance ARX- 500). Mass spectra were performed on Kompact Axima-CFR MALDI mass spectrometers. Optical rotations were recorded on a Perkin Elmer 341 polarimeter. Anhydrous solvents were obtained as follows: THF by distillation from sodium and benzophenone; dichloromethane from  $\text{CaH}_2$ . All other solvents were reagent grade. All moisture sensitive reactions were carried out in flame dried flask under argon atmosphere.

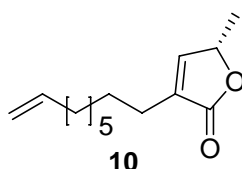

### (S)-5-methyl-3-(non-8-enyl)furan-2(5H)-one (10)

To a solution of diisopropylamine (6.4 mL, 0.046 mol) in anhydrous THF (100 mL) was added  $n\text{-BuLi}$  (18.2 mL, 1.6 M in hexane, 0.046 mol) at 0 °C, and the mixture was stirred for 30 min. After the mixture was stirred for an additional 30 min at -78 °C, anhydrous HMPA (10.6 mL, 0.065 mol) was added, and the mixture was stirred for 30 min. A solution of **9** (6.0 g, 0.03 mol) in THF (20 mL) was injected into the above mixture. After 30 min, a solution of O-THP-(S)-lactal (5.8 g, 0.036 mol) in THF (30 mL) was introduced, and the reaction mixture was stirred for 2 h at -78 °C. The mixture was quenched with saturated aqueous  $\text{NH}_4\text{Cl}$  and extracted with ether. The organic layer was washed with brine and dried ( $\text{Na}_2\text{SO}_4$ ). Removal of the solvents afforded a crude oil, which was treated with 10%  $\text{H}_2\text{SO}_4$  (60 mL) in THF (100 mL) for 20 h at rt. The reaction mixture was diluted with ether, washed with saturated aqueous  $\text{NaHCO}_3$  and brine, dried ( $\text{Na}_2\text{SO}_4$ ), and evaporated to give a crude oil. To the mixture of the above oil and  $\text{Et}_3\text{N}$  (17 mL, 0.12 mol) in  $\text{CH}_2\text{Cl}_2$  (50 mL) at 0 °C was added  $(\text{CF}_3\text{CO})_2\text{O}$  (8 mL, 0.061 mmol). The reaction was stirred at 0 °C for 12 h and at rt for 6 h, quenched with saturated  $\text{NH}_4\text{Cl}$ , and extracted with  $\text{CH}_2\text{Cl}_2$ .

After being dried ( $\text{Na}_2\text{SO}_4$ ), the extracts were filtered and concentrated under reduced pressure. The crude product was purified by flash column chromatography on silica gel to afford pure **10** (4.47 g, 67%).  $[\alpha]_{\text{D}}^{25} = +46.28$  ( $c$  0.72,  $\text{CHCl}_3$ );  $^1\text{H}$  NMR (400 MHz,  $\text{CDCl}_3$ ): 6.98 (d,  $J = 2.8$  Hz, 1H), 5.80 (ddt,  $J = 16.8, 10.2, 6.4$  Hz, 1H), 5.01-4.78 (m, 3H), 2.26 (m, 2H), 2.05 (m, 2H), 1.54 (m, 2H), 1.40 (d,  $J = 6.8$  Hz, 3H), 1.31 (brs, 8H) ppm; MS (EI,  $m/z$ ): 223  $[\text{M}+\text{H}]^+$ . Anal. calcd for  $\text{C}_{14}\text{H}_{22}\text{O}_2$  (%): C, 75.68; H, 9.91. Found: C, 75.30; H, 9.54.

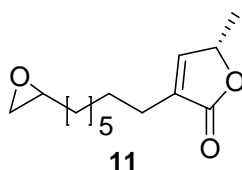

**(5S)-5-methyl-3-(7-(oxiran-2-yl)heptyl)furan-2(5H)-one (11)**

To a 100 mL flask were added **10** (2.22 g, 10.0 mmol), dry  $\text{CH}_2\text{Cl}_2$  (30 mL), and MCPBA (1.73 g, 10.0 mmol) in dry  $\text{CH}_2\text{Cl}_2$  (20 mL) at 0 °C under a  $\text{N}_2$  atmosphere. The reaction mixture was stirred at rt for 12 h. Excess MCPBA was removed by the addition of aqueous sodium thiosulfate. The mixture was transferred to a separating funnel. The organic layer was diluted with  $\text{CH}_2\text{Cl}_2$  (20 mL), washed successively with saturated  $\text{NaHCO}_3$  and saturated brine, and then dried over  $\text{Na}_2\text{SO}_4$ . The solvent was removed under reduced pressure, and the residue was chromatographed on silica gel to give **11** as a colorless oil (2.05 g, 86%).  $^1\text{H}$  NMR (400 MHz,  $\text{CDCl}_3$ ):  $\delta$  6.96 (d,  $J = 2.8$  Hz, 1H), 4.95 (dq,  $J = 6.8, 1.7$  Hz, 1H), 2.85 (m, 1H), 2.71-2.68 (m, 1H), 2.41 (dd,  $J = 5.0, 2.7$  Hz, 1H), 2.21 (t,  $J = 7.7$  Hz, 2H), 1.51-1.29 (m, 12H), 1.36 (d,  $J = 6.8$  Hz, 3H) ppm.  $^{13}\text{C}$  NMR (100 MHz,  $\text{CDCl}_3$ ):  $\delta$  173.7, 148.9, 134.2, 77.3, 52.2, 46.9, 32.4, 29.2, 29.1, 29.0, 27.3, 25.8, 25.1, 19.1 ppm. MS (ESI,  $m/z$ ): 239  $[\text{M}+1]^+$ .

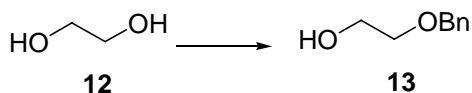

**2-(benzyloxy)ethanol (13).** To a mixture of sodium hydride (5.10 g, 0.17 mol, 80%, w/w) in 300 mL dried THF was added dry ethylene glycol (50.2 mL, 0.9 mol) at room temperature over 1 h, stirred another 0.5 h, and a large amount of white precipitate had formed. Then the mixture was refluxed and benzyl bromide (17.8 mL, 0.15 mol) was added over 2 h. The mixture was refluxed for 15 h, cooled to room temperature, quenched with saturated aqueous NH<sub>4</sub>Cl (5 mL) solution and evaporated THF through reduced pressure. The residue was extracted with ethyl acetate (30 mL × 3). The combined organic layers were washed with saturated aqueous NH<sub>4</sub>Cl solution and brine, dried over anhydrous Na<sub>2</sub>SO<sub>4</sub>, filtered and concentrated under reduced pressure. The resulting oil was distilled under reduced pressure to afford **13** (18.5 g, 81%) as a colorless oil. <sup>1</sup>H NMR (400 MHz, CDCl<sub>3</sub>): δ 7.35-7.29 (m, 5H), 4.57 (s, 2H), 3.78-3.74 (m, 2H), 3.62-3.59 (m, 2H), 2.10 (br, 1H, OH) ppm.

## 2. RP-HPLC Data of the Compounds 2–8.

**Table S1**

| compounds | t <sub>R</sub> | purity | methanol/water | MS calcd | HRMS     |
|-----------|----------------|--------|----------------|----------|----------|
| <b>2</b>  | 5.41           | 99%    | 88%            | 515.3942 | 515.3939 |
| <b>3</b>  | 8.72           | 98%    | 88%            | 591.4231 | 591.4234 |
| <b>4</b>  | 10.59          | 96%    | 78%            | 549.3786 | 549.3784 |
| <b>5</b>  | 7.06           | 97%    | 78%            | 587.3786 | 587.3555 |
| <b>6</b>  | 8.45           | 95%    | 75%            | 601.3711 | 601.3712 |
| <b>7</b>  | 8.36           | 97%    | 85%            | 647.3918 | 647.3915 |
| <b>8</b>  | 7.91           | 99%    | 78%            | 651.3876 | 651.3865 |

<sup>a</sup> Analytical HPLC method: Agilent C18 column (250 × 4.6 mm); solvent system, A, 0.05% TFA in water; B, methanol; B in water over 30 min; flow rate, 1.0 mL/min; wavelength, 215 nm. <sup>c</sup> Purified products were further characterized by mass spectrometers.

### 3. copies of $^1\text{H}$ and $^{13}\text{C}$ NMR

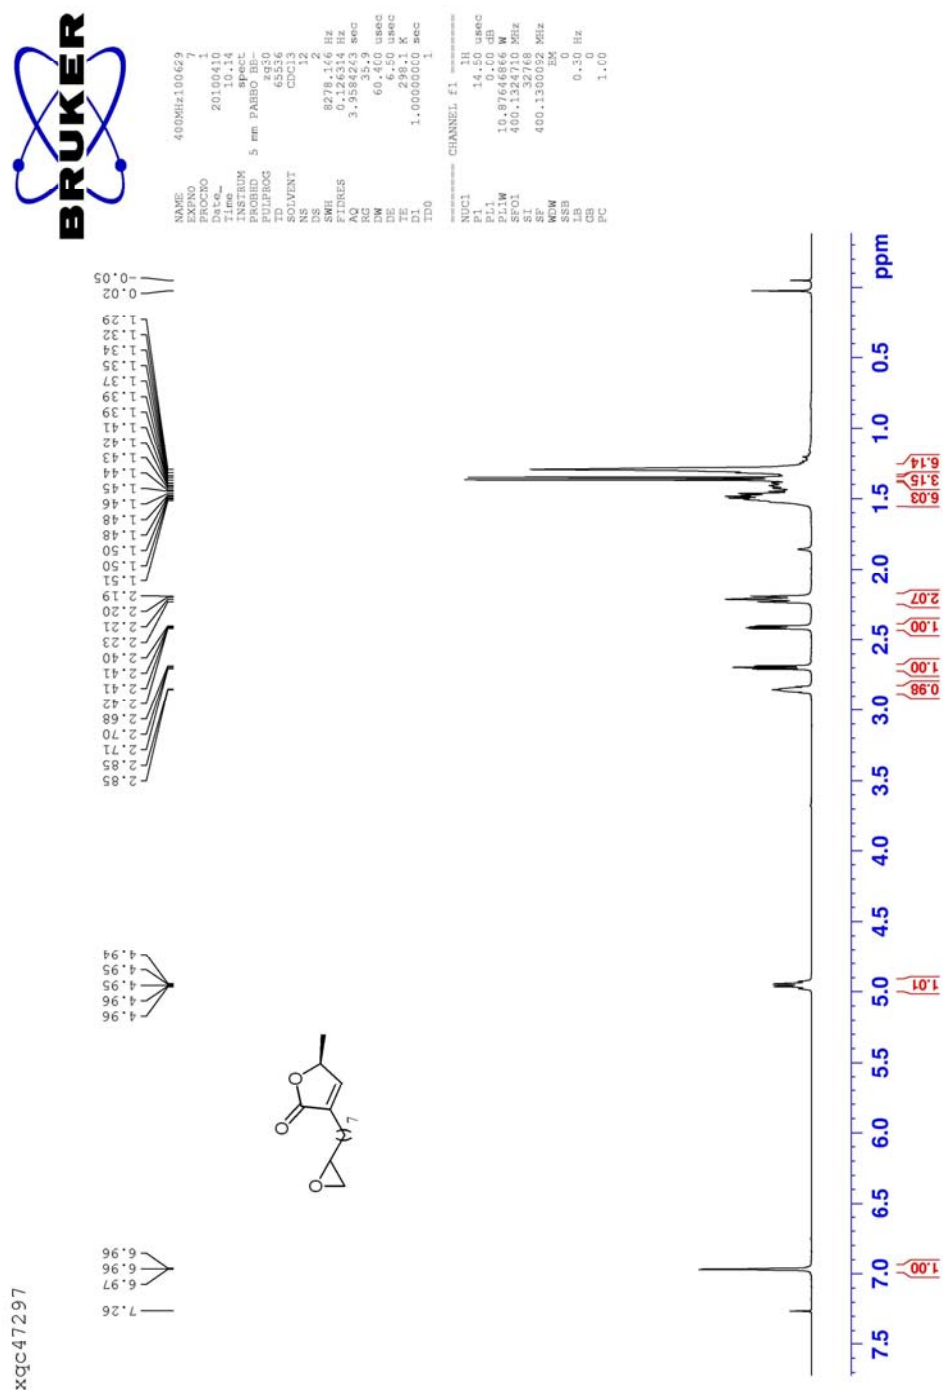

$^1\text{H}$  NMR Spectra of Compound **11**

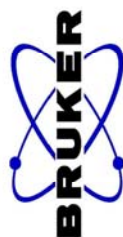

xqc47297

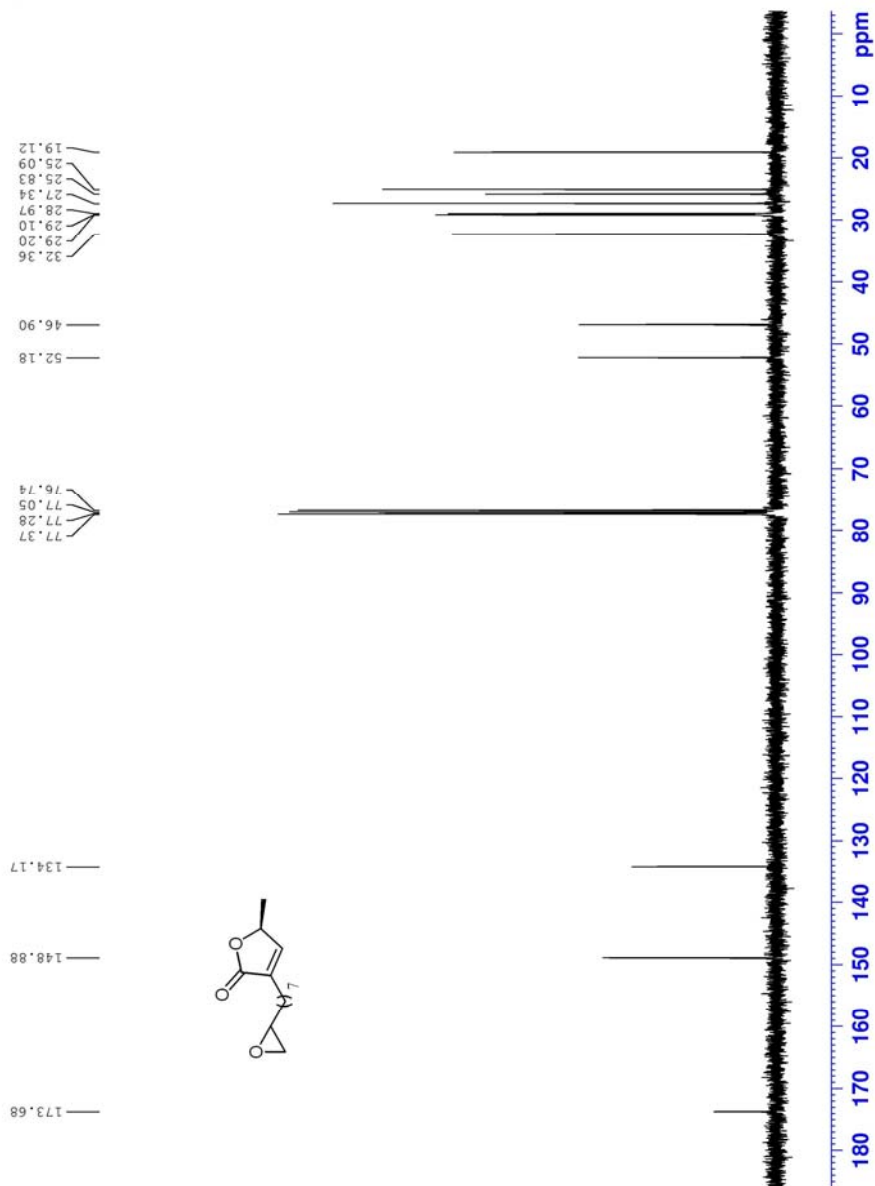

<sup>13</sup>C NMR spectra of compound 11

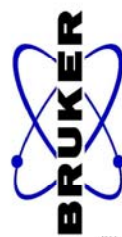

xiaocicai-145129

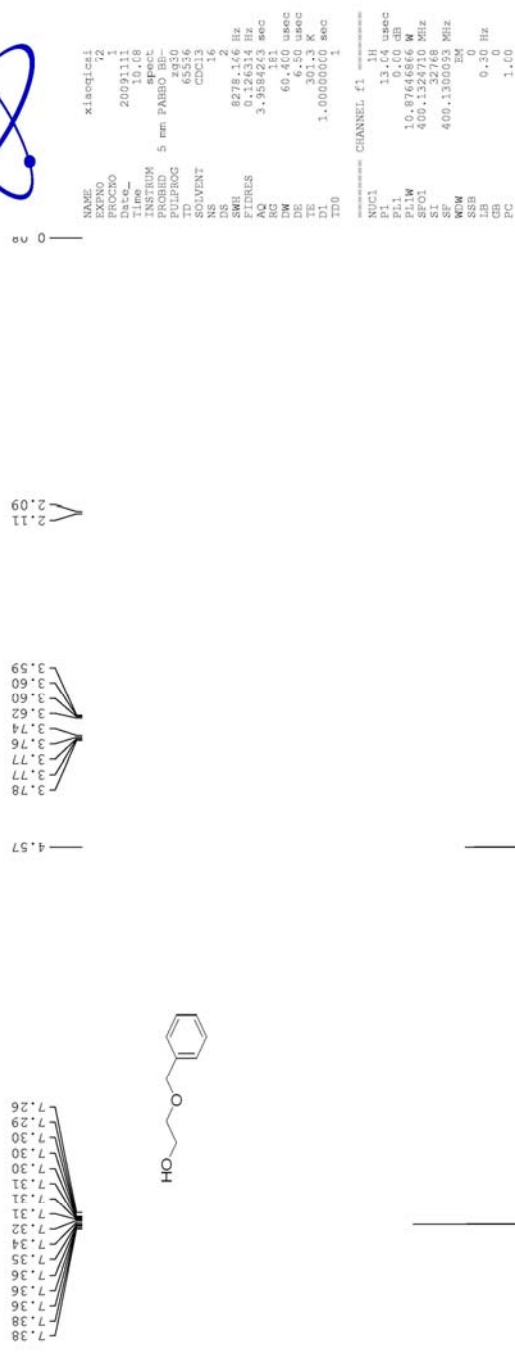

<sup>1</sup>H NMR spectra of compound **13**

xiaocqicai-145081

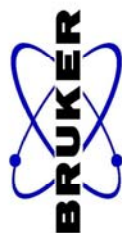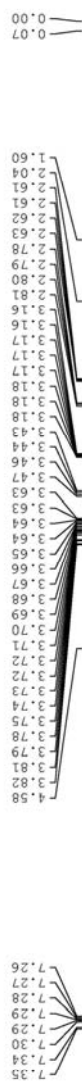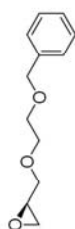

NAME xiaocqicai  
EXPNO 48  
PROCNO 1  
Date\_ 20091012  
Time 20.14  
INSTRUM spect  
PROBHD 5 mm PABBO BB-  
PULPROG zgpg30  
TD 65536  
SOLVENT CDCl3  
NS 16  
DS 2  
SWH 8278.146 Hz  
FIDRES 0.126314 Hz  
AQ 3.958423 sec  
RG 322.5  
DE 6.60 usec  
TE 298.2 K  
D1 1.0000000 sec  
TD0 1  
CHANNEL f1  
NUC1 1H  
P1 13.04 usec  
PL1 0.00 dB  
PL1W 10.8766666 dB  
SFO1 400.1324710 MHz  
SI 32768  
SF 400.1300000 MHz  
WDW EM  
SSB 0  
LB 0.30 Hz  
GB 0  
PC 1.00

<sup>1</sup>H NMR spectra of compound 14



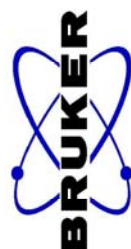

xiaoqicai-145150

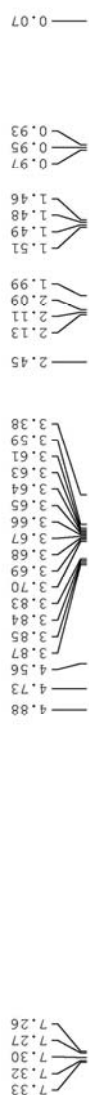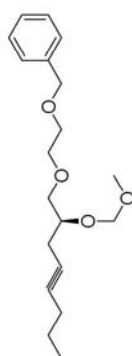

NAME xiaoqicai  
EXPNO 1  
PROCNO 85  
Date\_ 20091127  
Time 19.57  
INSTRUM spect  
PROBHD 5 mm PABBO BB-  
PULPROG zg30  
TD 65536  
SOLVENT CDCl3  
NS 12  
SWH 8278.166 Hz  
FIDRES 0.126314 Hz  
AQ 3.9584243 sec  
RG 25.4  
DW 60.400 usec  
DE 65.00 usec  
TE 298.6 K  
D1 1.00000000 sec  
TD0 1  
CHANNEL f1  
NUC1 1H  
P1 13.04 usec  
PL1 0.00 dB  
PL1W 10.87646866 W  
SFO1 400.1324710 MHz  
SI 32768  
SF 400.1300000 MHz  
WDW EM  
SSB 0  
LB 0.30 Hz  
GB 0  
PC 1.00

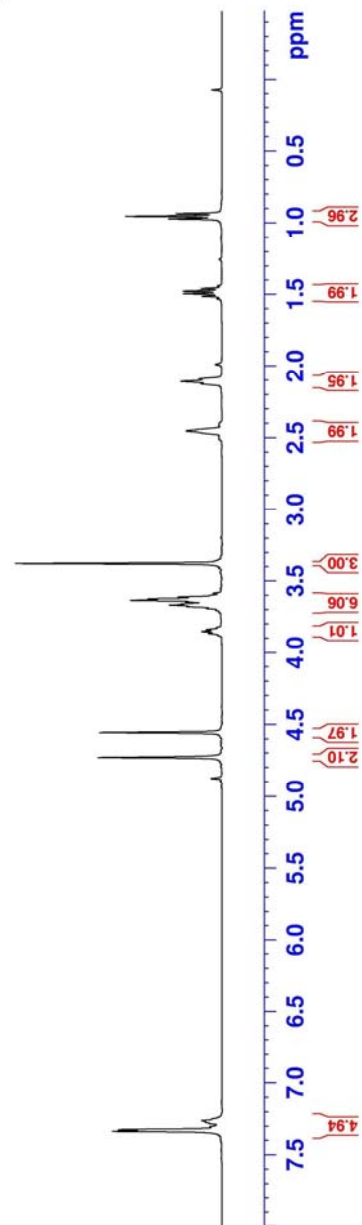

$^1\text{H}$  NMR spectra of compound 22

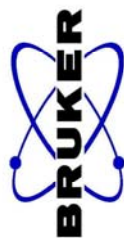

xiaocical-145150

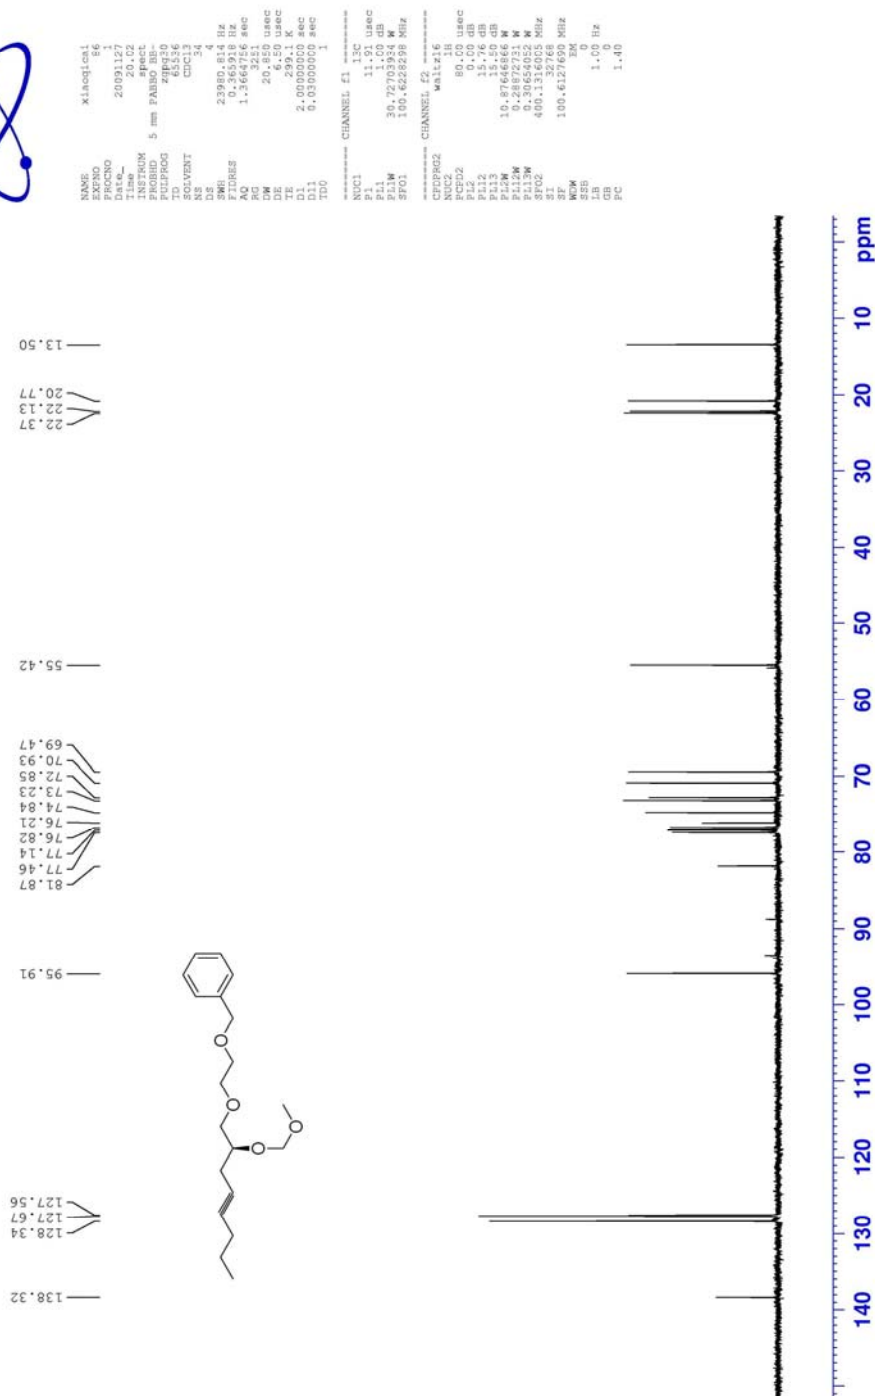

<sup>13</sup>C NMR spectra of compound 22

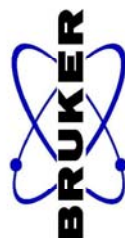

xiaocqicai-47246

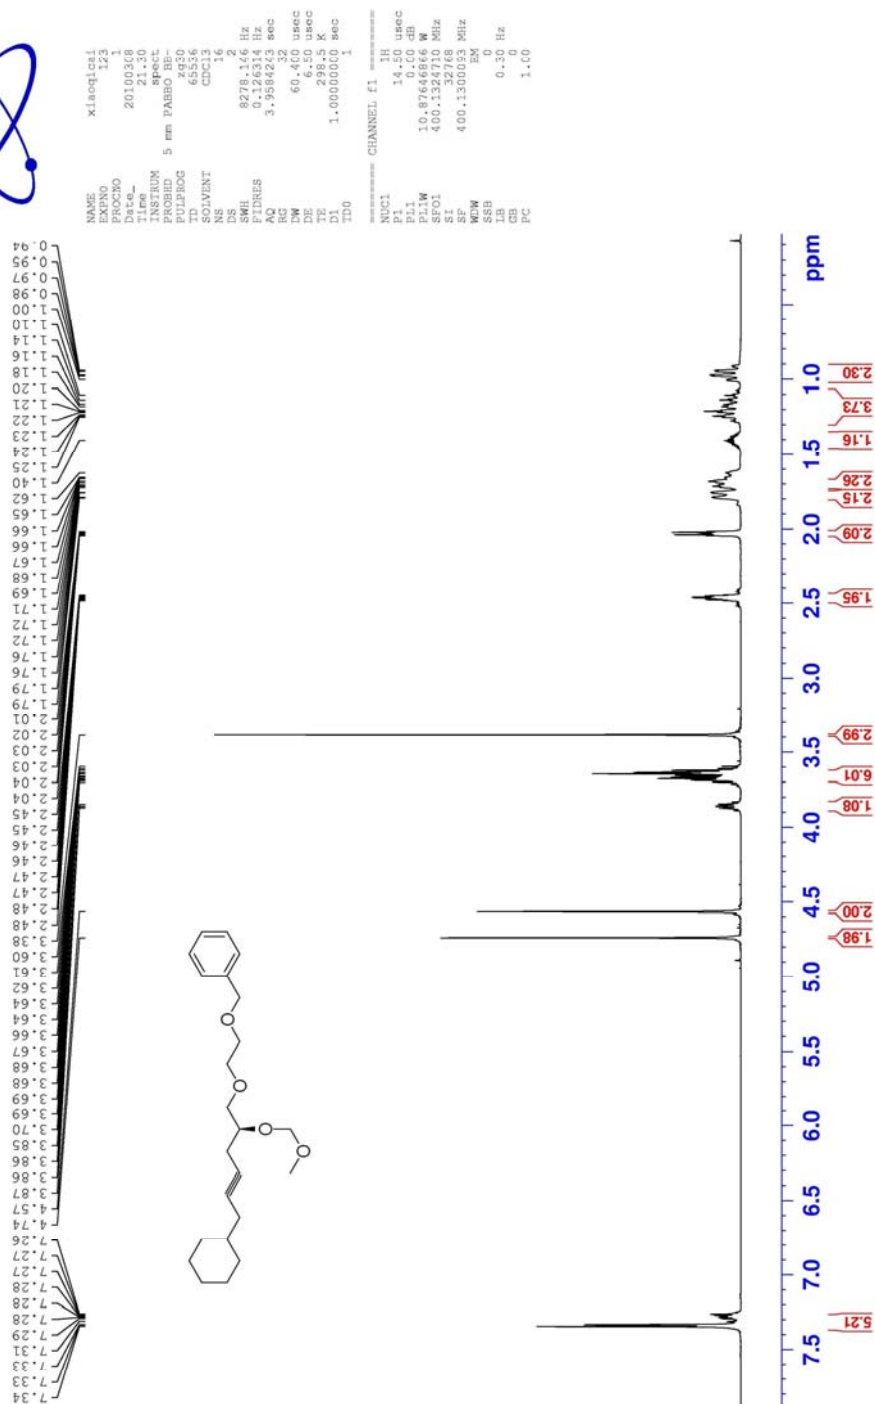

<sup>1</sup>H NMR spectra of compound 23

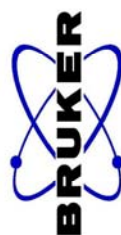

xiaoqicai-47246

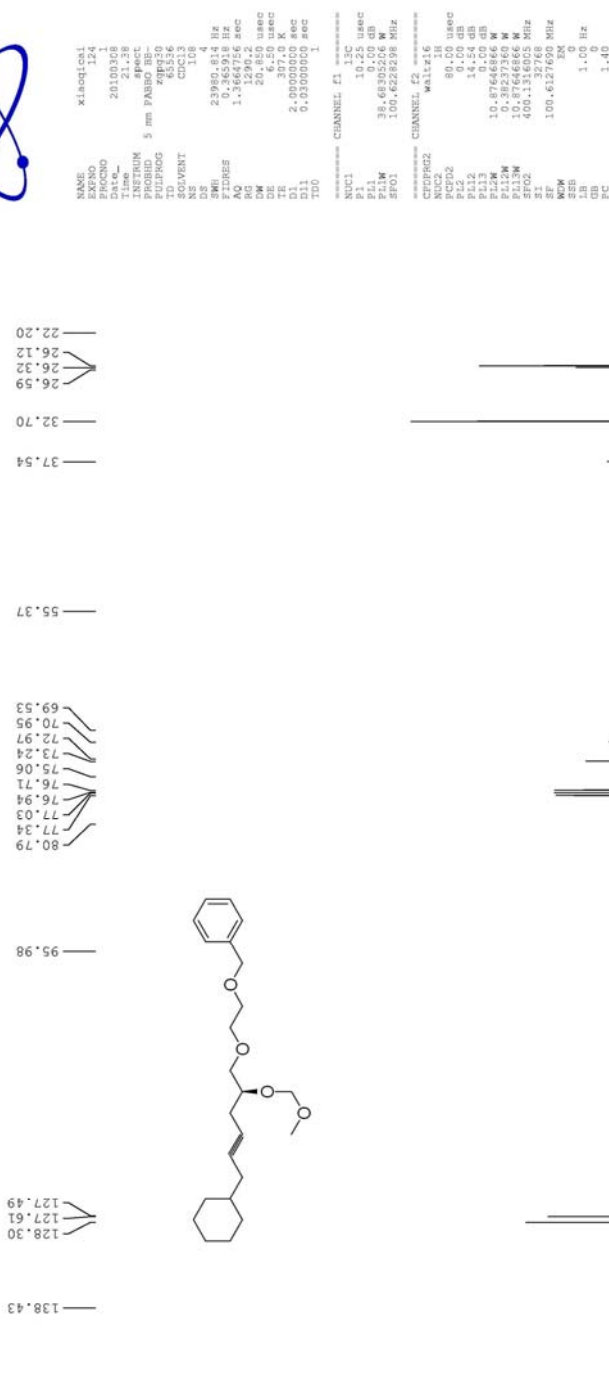

<sup>13</sup>C NMR spectra of compound 23

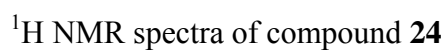





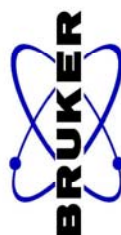

xqc47375

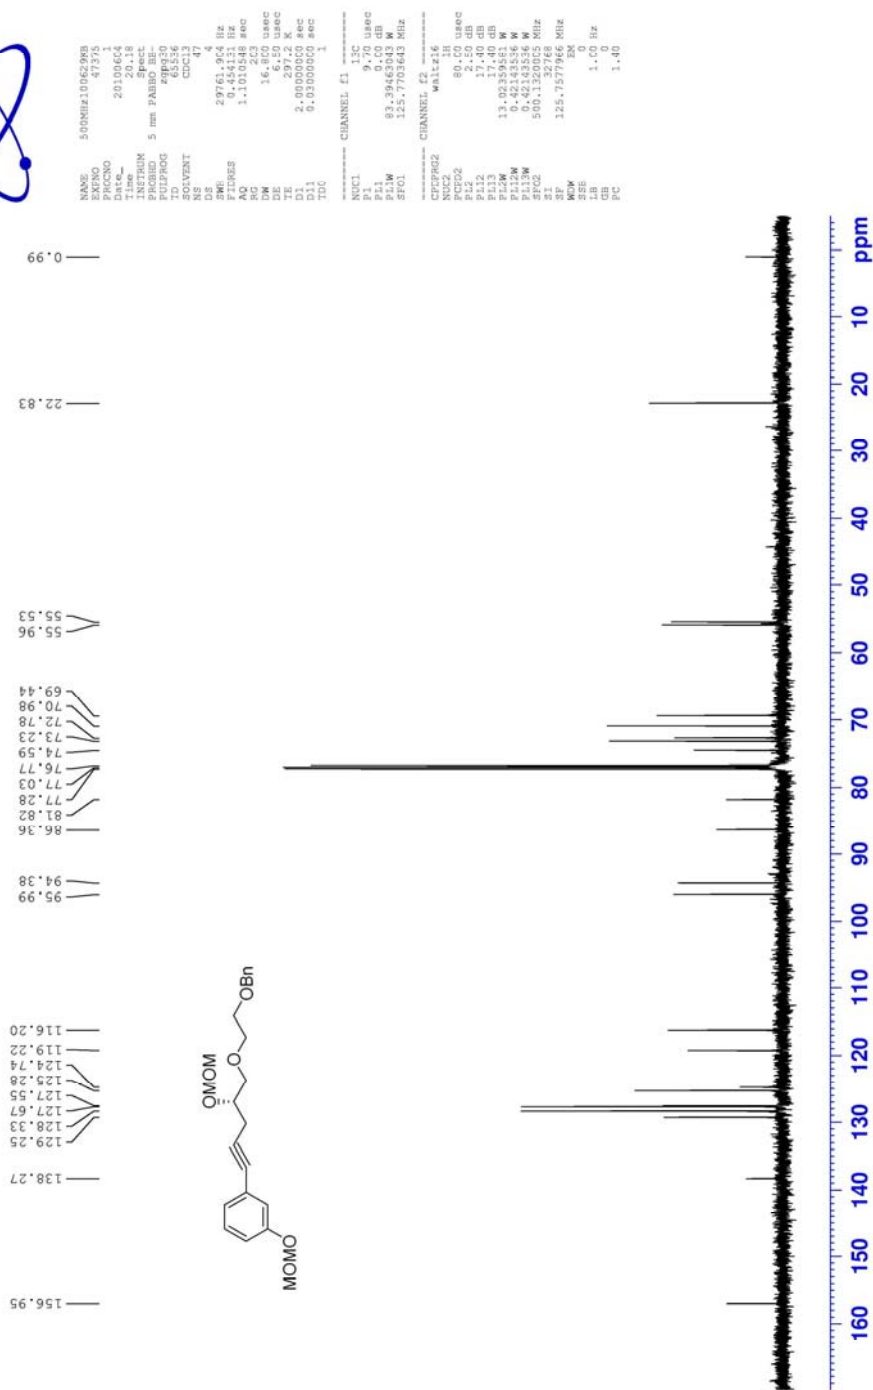

<sup>13</sup>C NMR spectra of compound 25



XQC47338

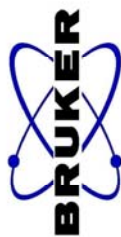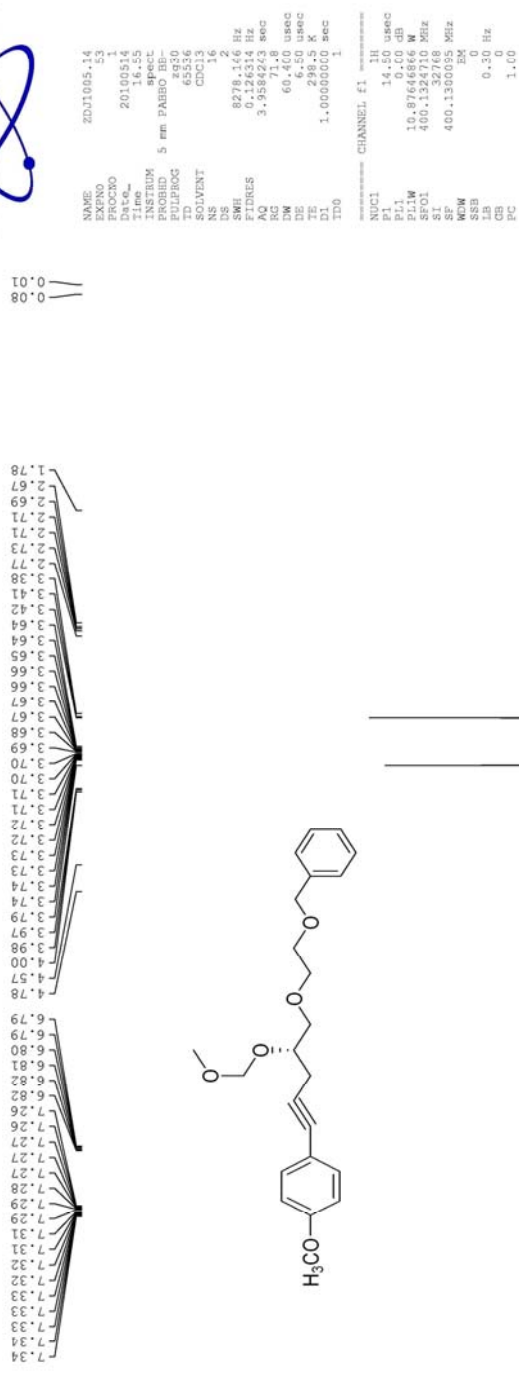

<sup>1</sup>H NMR spectra of compound 26



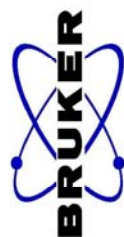

xiaodigai-145178

0.08  
0.01

7.26  
7.28  
7.29  
7.30  
7.32  
7.34  
7.35  
7.37  
7.37  
7.42  
7.44  
7.45  
7.46  
4.80  
4.59  
4.03  
4.02  
4.01  
3.75  
3.73  
3.73  
3.71  
3.71  
3.70  
3.69  
3.68  
3.67  
3.66  
3.44  
2.78  
2.77  
2.76  
2.75

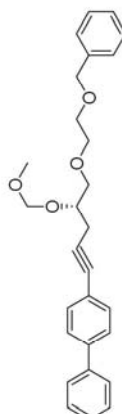

NAME xiaodigai  
EXPNO 105  
PROCNO 1  
Date\_ 20100117  
Time 21:17  
INSTRUM spect  
PROBHD 5 mm PABBO BB-  
PULPROG zg30  
TD 65536  
F2 400.132768  
SOLVENT CDCl3  
NS 16  
DS 2  
SWH 8278.166 Hz  
F2 400.132768 MHz  
AQ 3.958423 sec  
RG 114  
DM 60.400 usec  
DE 29.50 usec  
TE 29.50 usec  
D1 1.0000000 sec  
TD0 1  
CHANNEL f1 400.132768 MHz  
NUC1 1H  
P1 14.50 usec  
PL1 0.00 dB  
PL12 10.8764866 W  
P11W 400.132768 MHz  
SI 32768  
SF 400.1300095 MHz  
WCM EM  
ZS 0  
GB 0  
PC 1.00

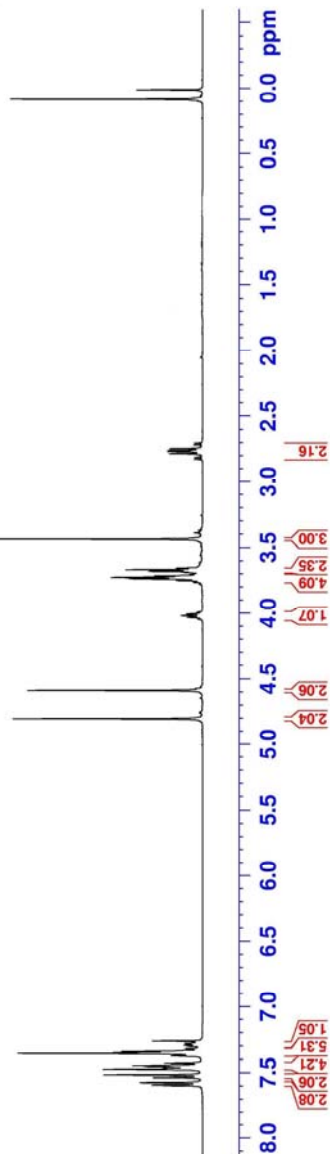

<sup>1</sup>H NMR spectra of compound 27

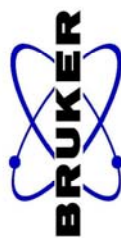

xiaoqicai-145178

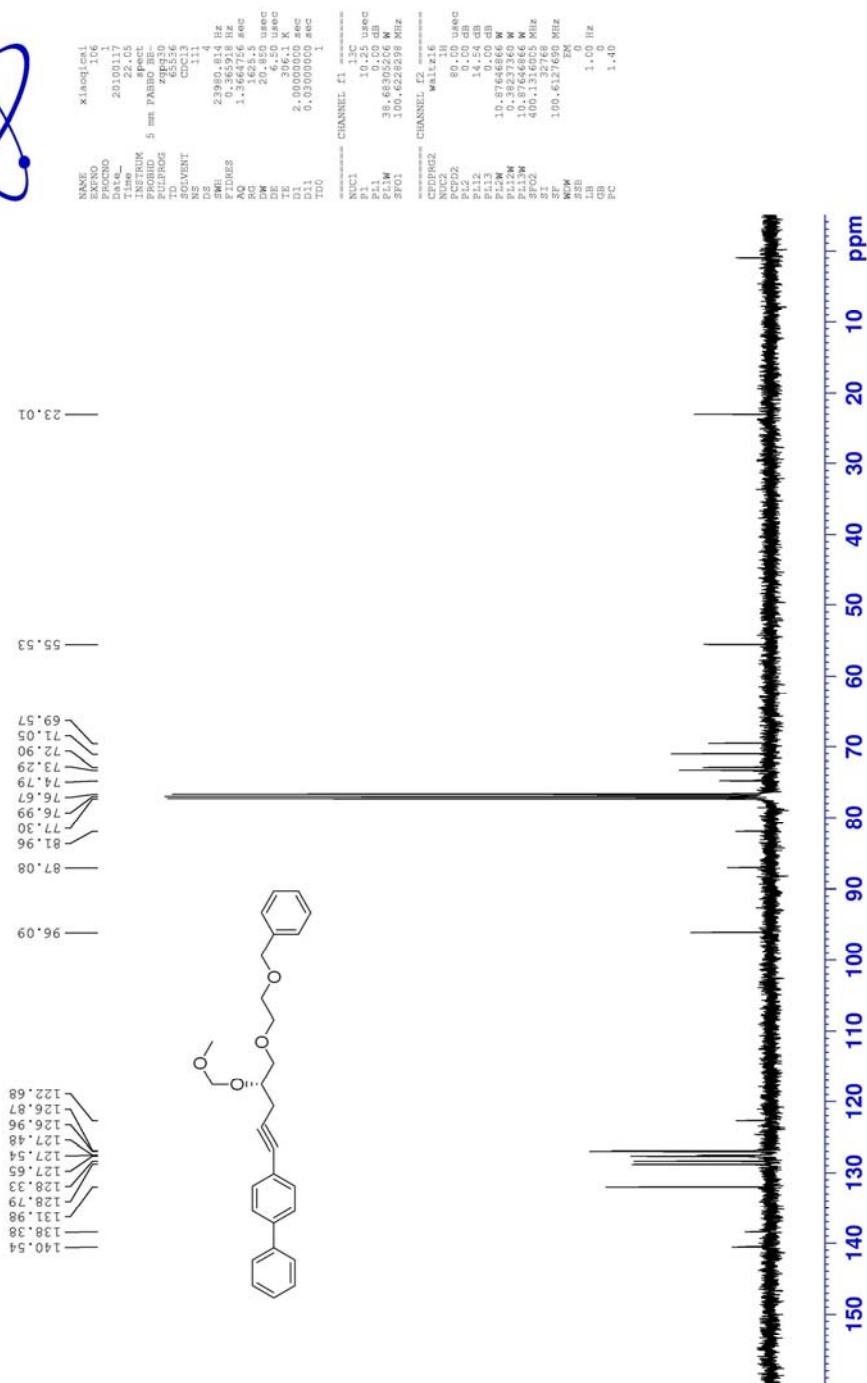

<sup>13</sup>C NMR spectra of compound 27

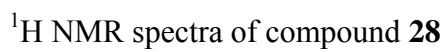

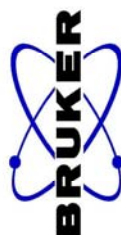

xqc47336

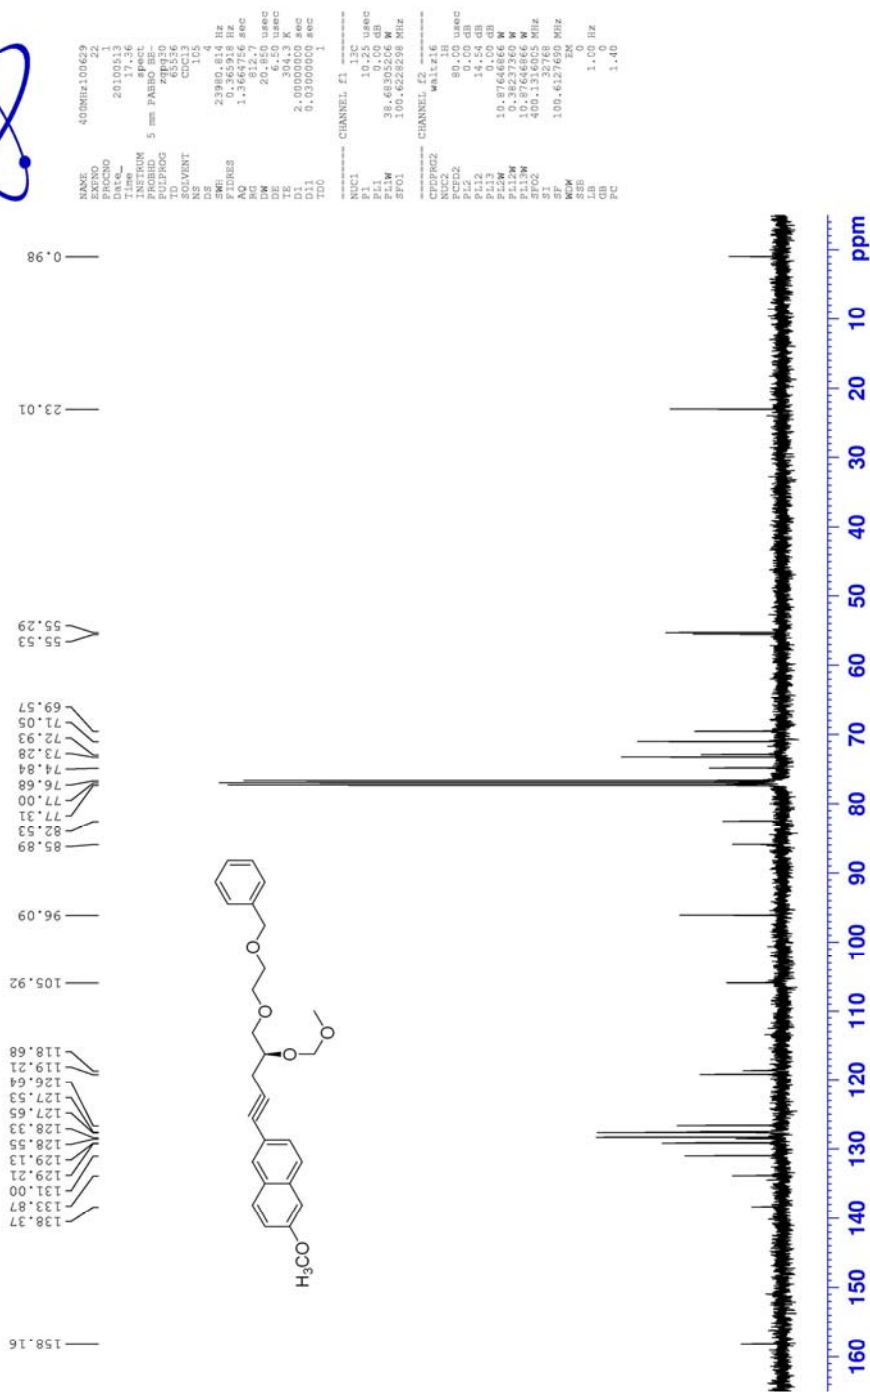

<sup>13</sup>C NMR spectra of compound 28

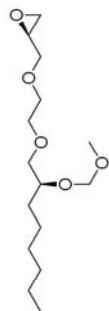

S23

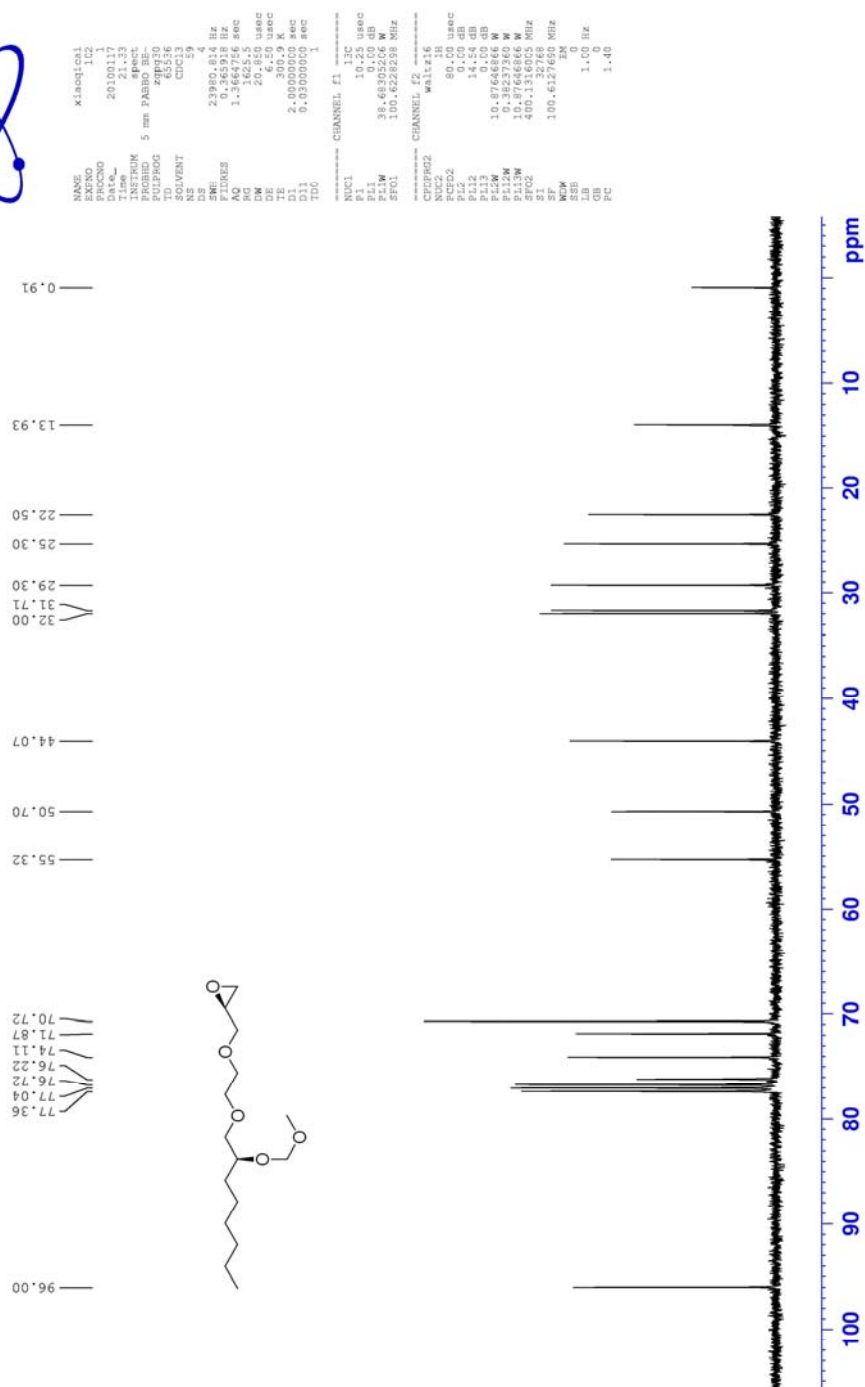<sup>13</sup>C NMR spectra of compound **29**



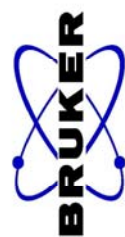

xiaogical-47262

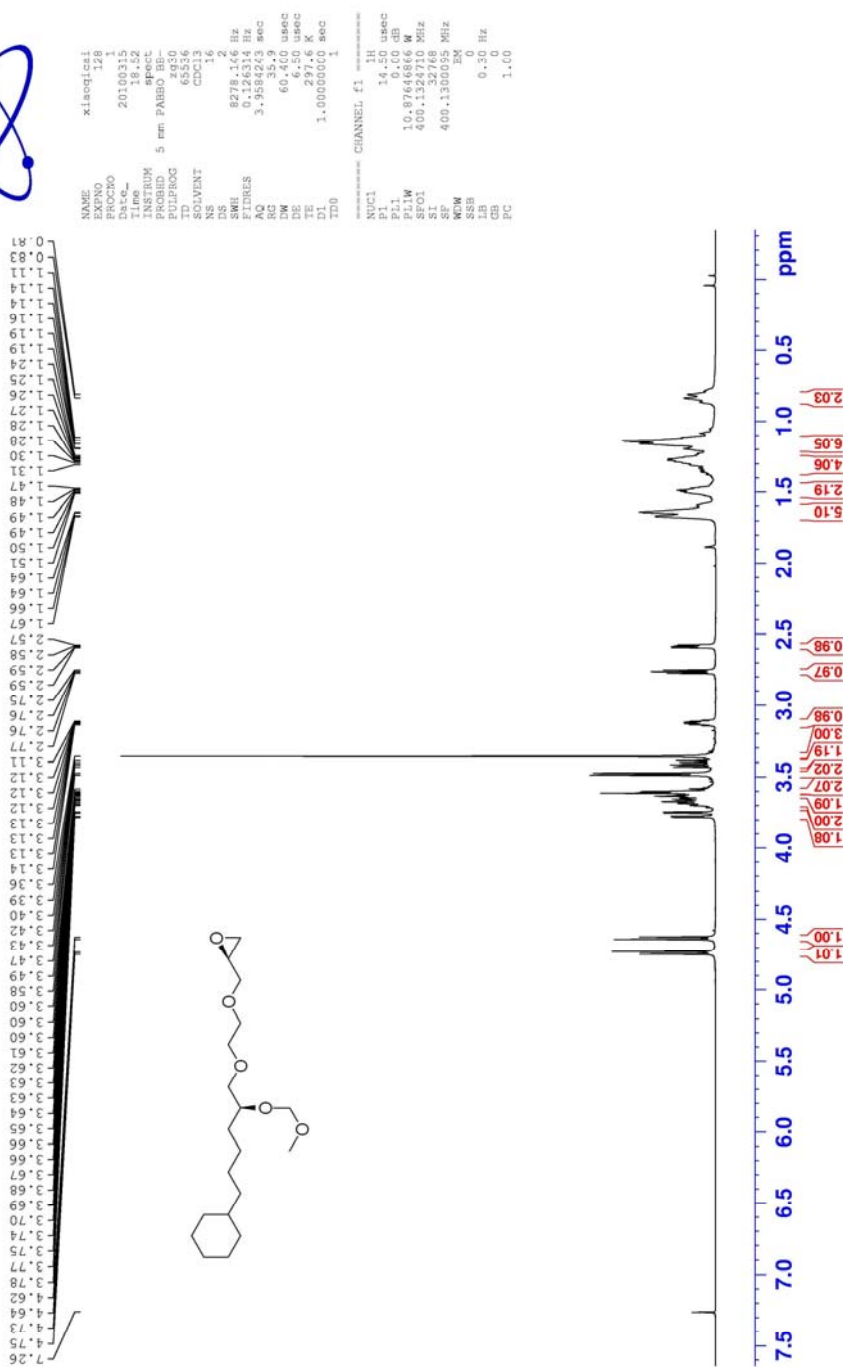

<sup>1</sup>H NMR spectra of compound **30**

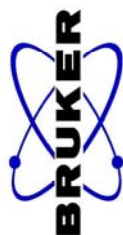

xiaogicai-47262

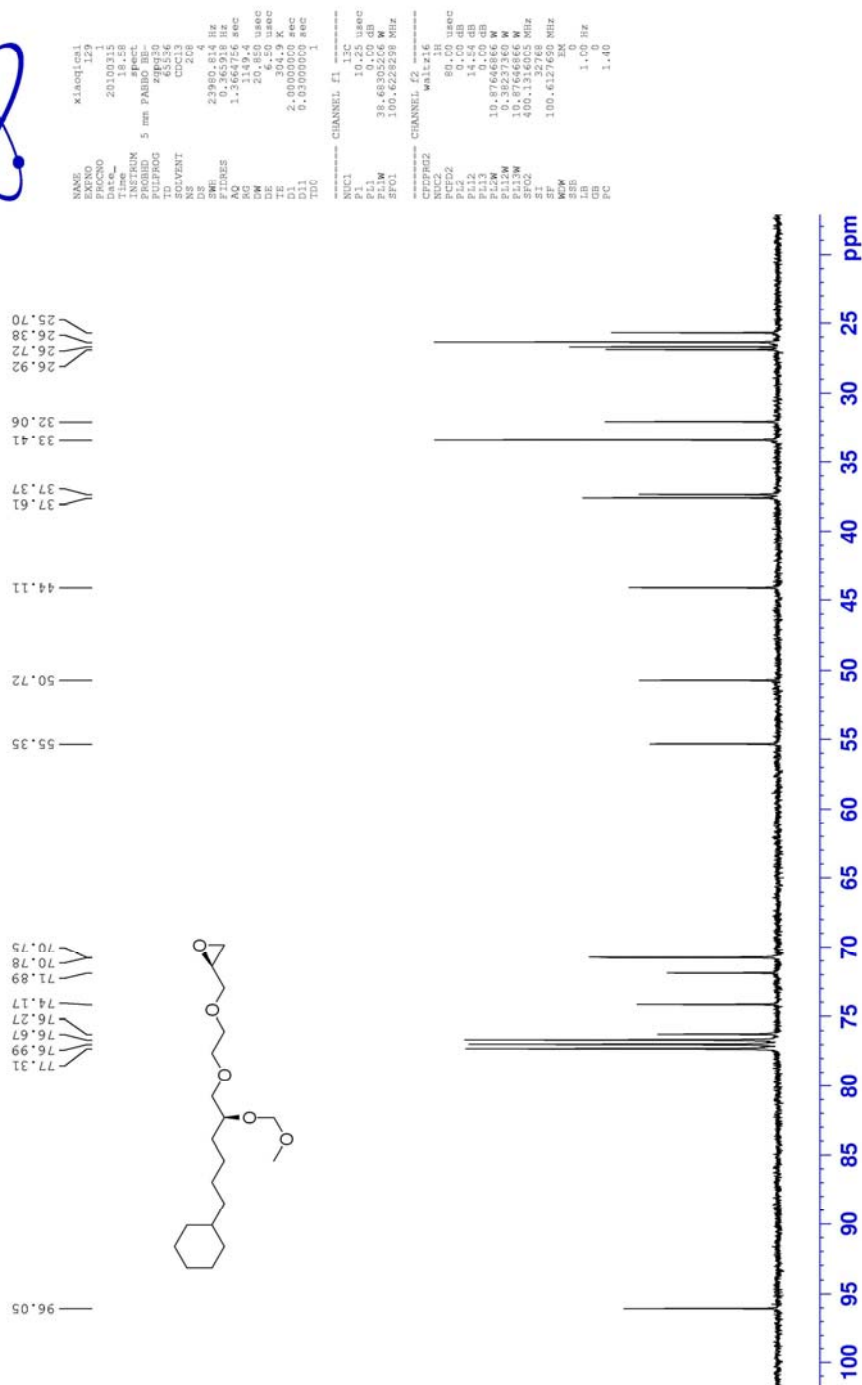

<sup>13</sup>C NMR spectra of compound **30**

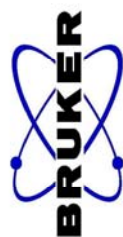

xiaogicai-47214

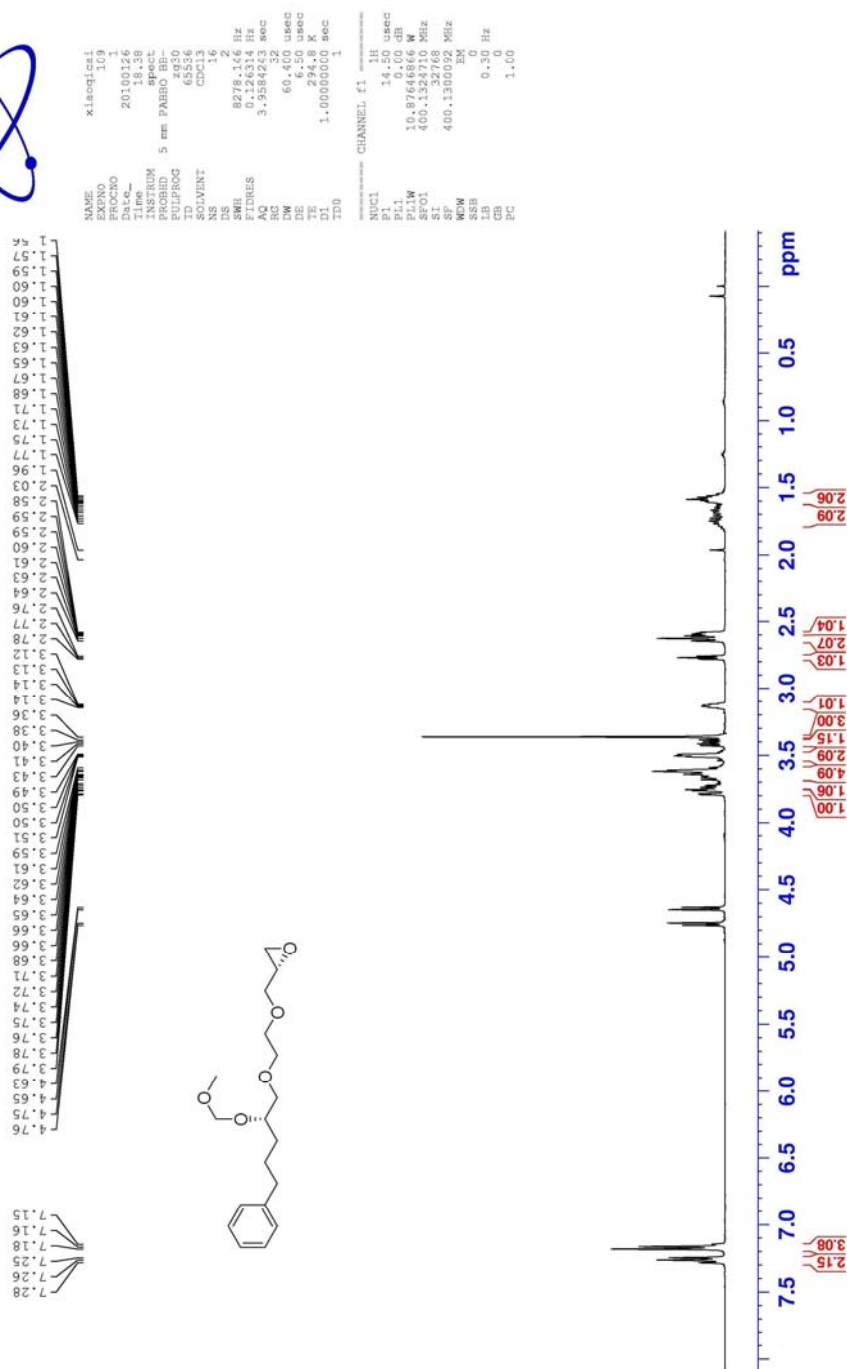

<sup>1</sup>H NMR spectra of compound **31**

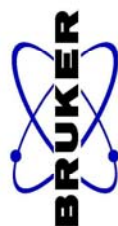

xiaoqicai-47214

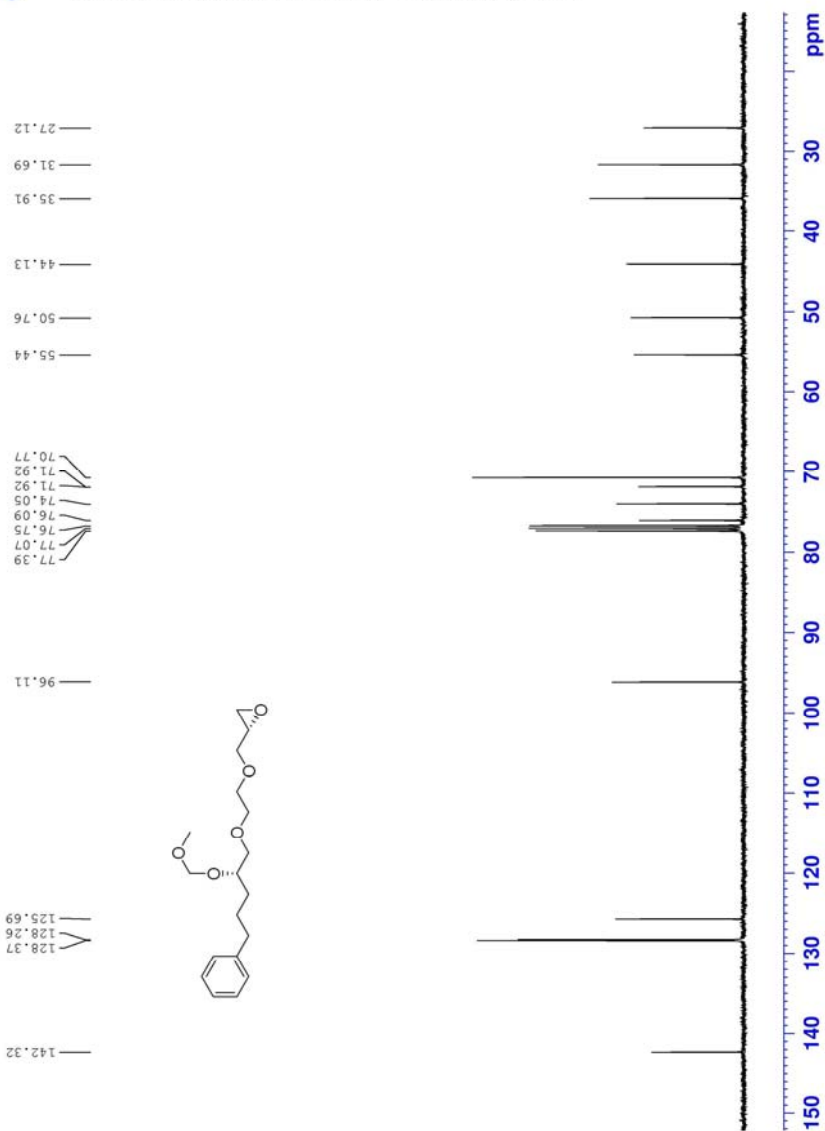

NAME xiaoqicai  
EXPNO 110  
PROCNO 2  
Date\_ 20101224  
Time 18:44  
PROBHD 5 mm PAULI  
PULPROG zgpg30  
TD 65536  
F2 -0.256  
WDW EM  
SSB 0  
GB 0  
PC 1.40  
NS 256  
DS 4  
DE 23980.52 Hz  
FIRES 0.365218 Hz  
AQ 1.366476 sec  
RG 327.5  
DM 20.850 usec  
DE 6.50 usec  
DI 1  
D1 2.00000000 sec  
D11 0.03000000 sec  
D12 1  
NUC1 13C  
NUC2 1H  
P1 10.25 usec  
P11 0.00 dB  
P2 38.433750 dB  
P21 0.00 dB  
SFO1 100.622859 MHz  
SFO2 400.136605 MHz  
SFO3 400.136605 MHz  
SFO4 100.612780 MHz  
WDW EM  
SSB 0  
GB 0  
PC 1.40

$^{13}\text{C}$  NMR spectra of compound **31**

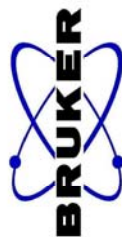

xqc47383

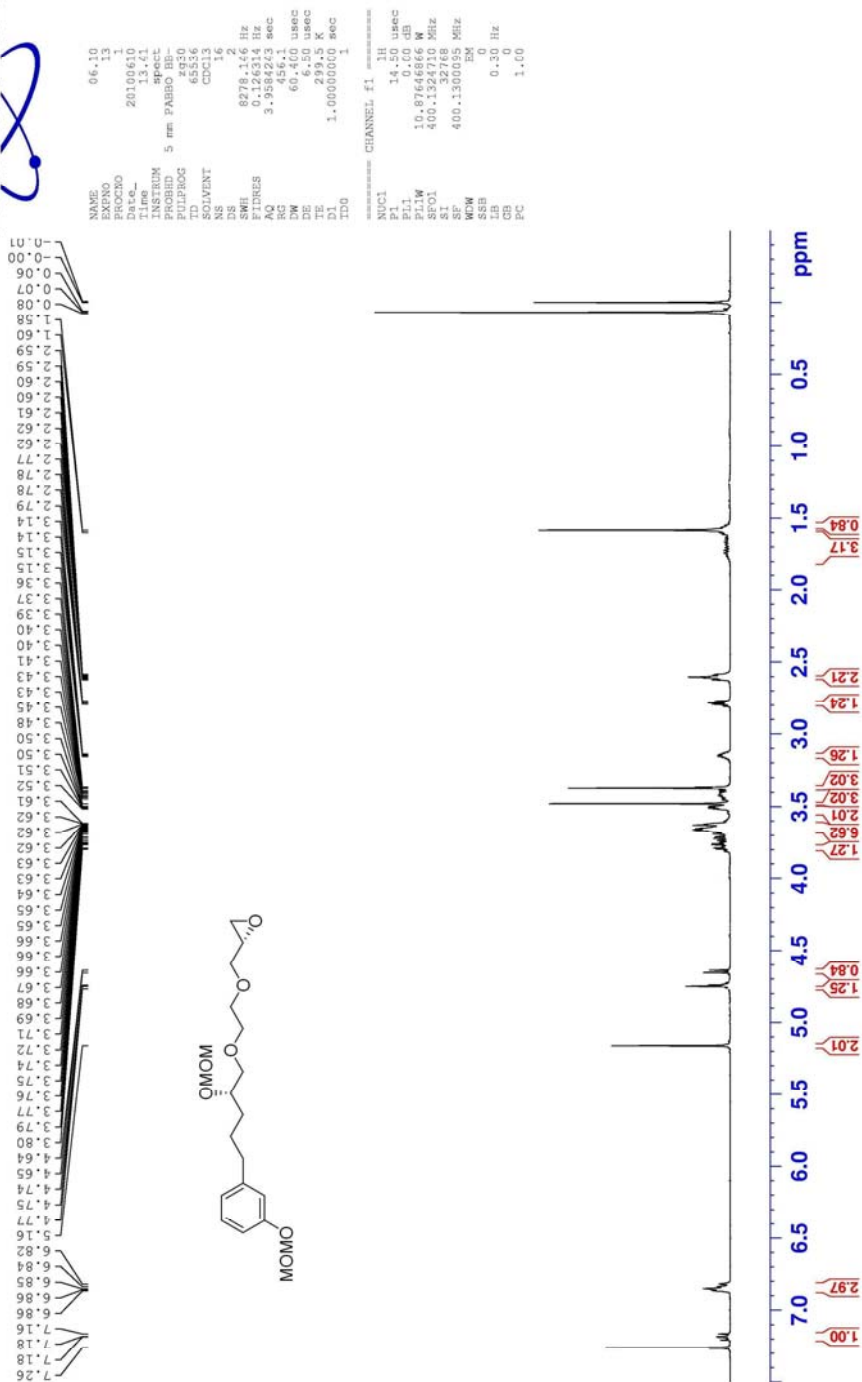

<sup>1</sup>H NMR spectra of compound 32

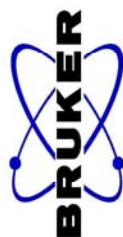

47383

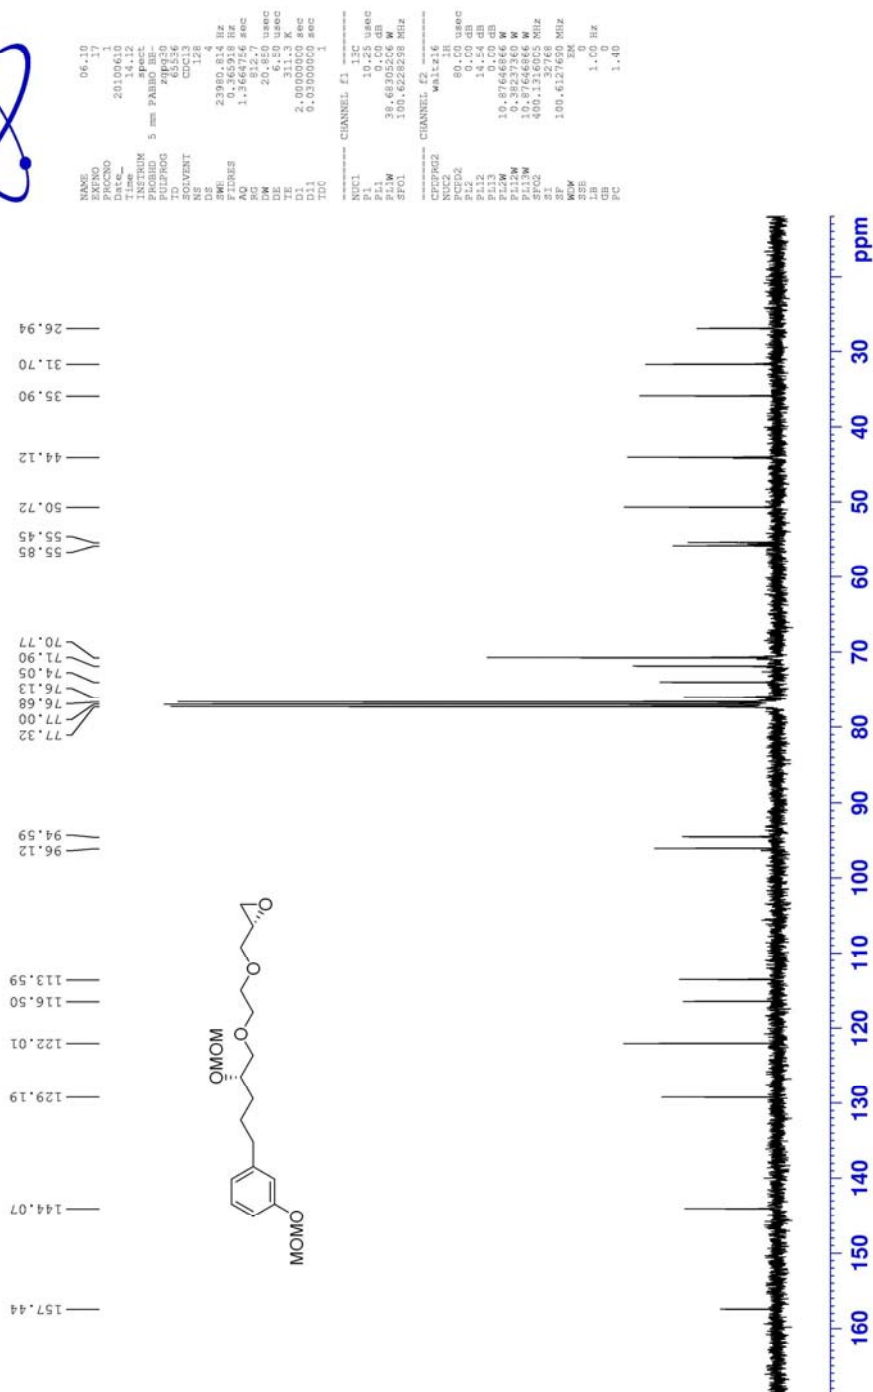

<sup>13</sup>C NMR spectra of compound 32



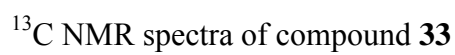



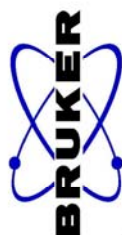

xiaocqicai-145187

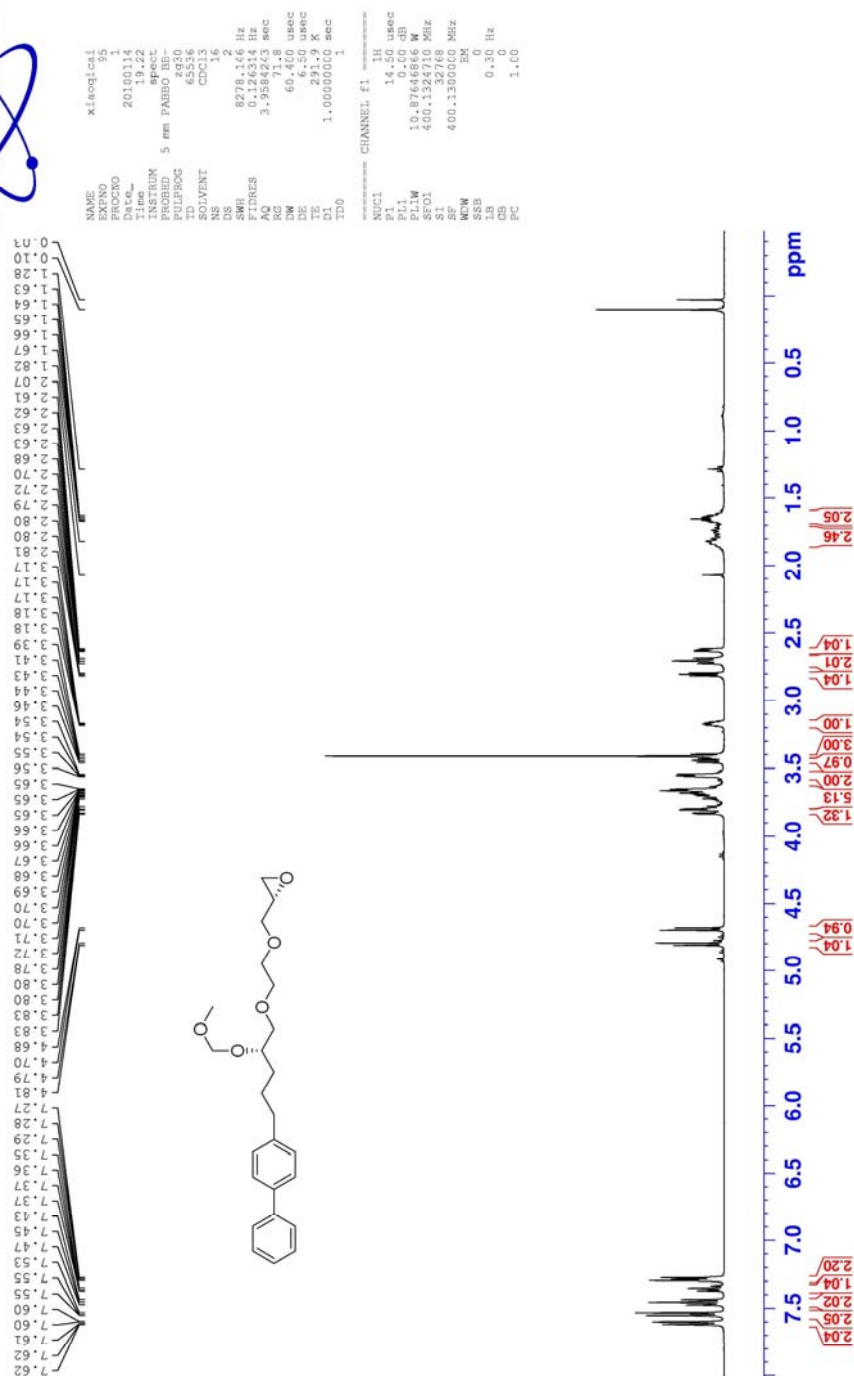

<sup>1</sup>H NMR spectra of compound **34**

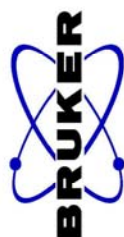

xiaoqicai-145187

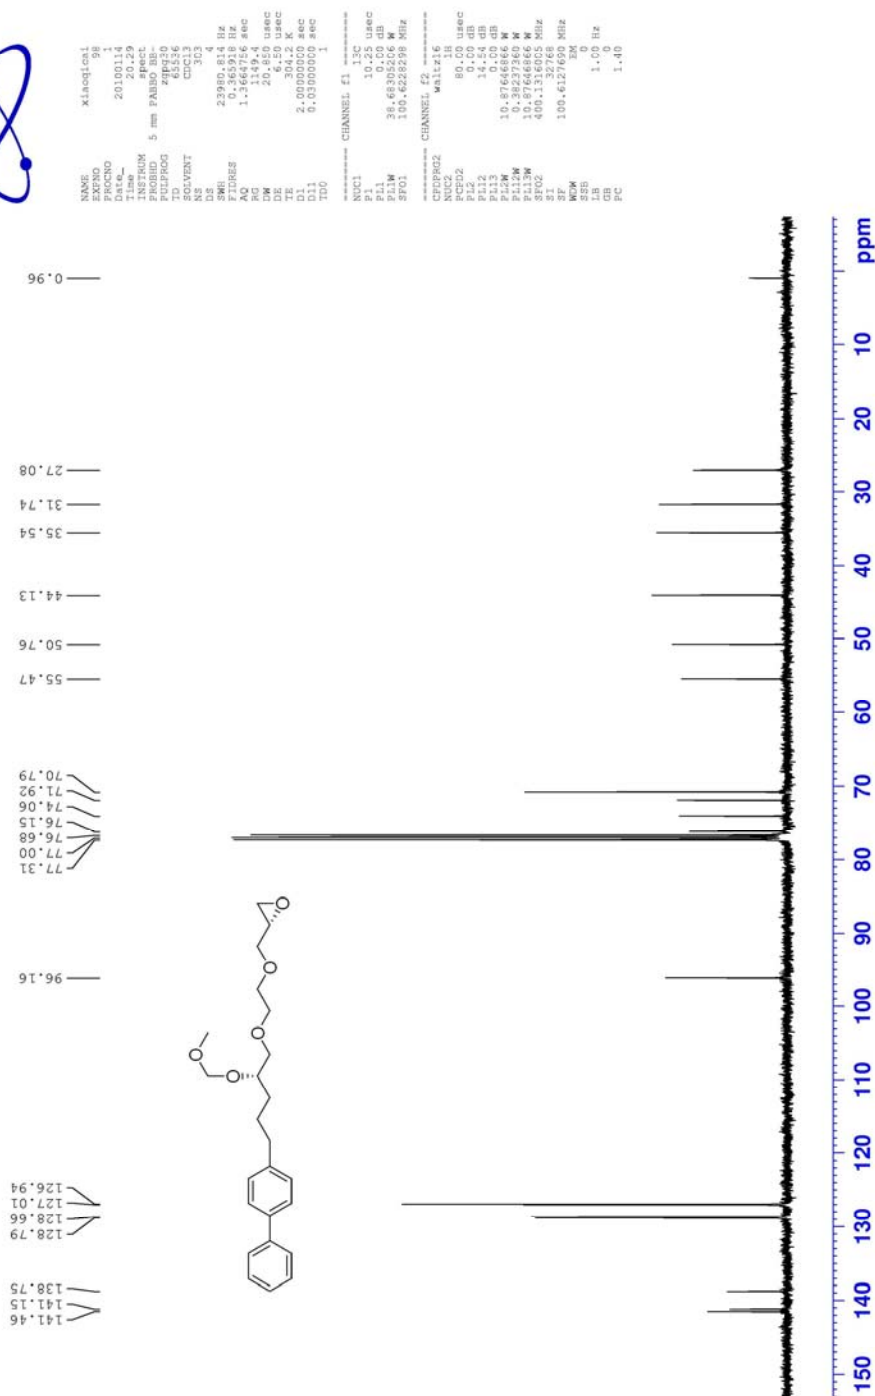

<sup>13</sup>C NMR spectra of compound **34**

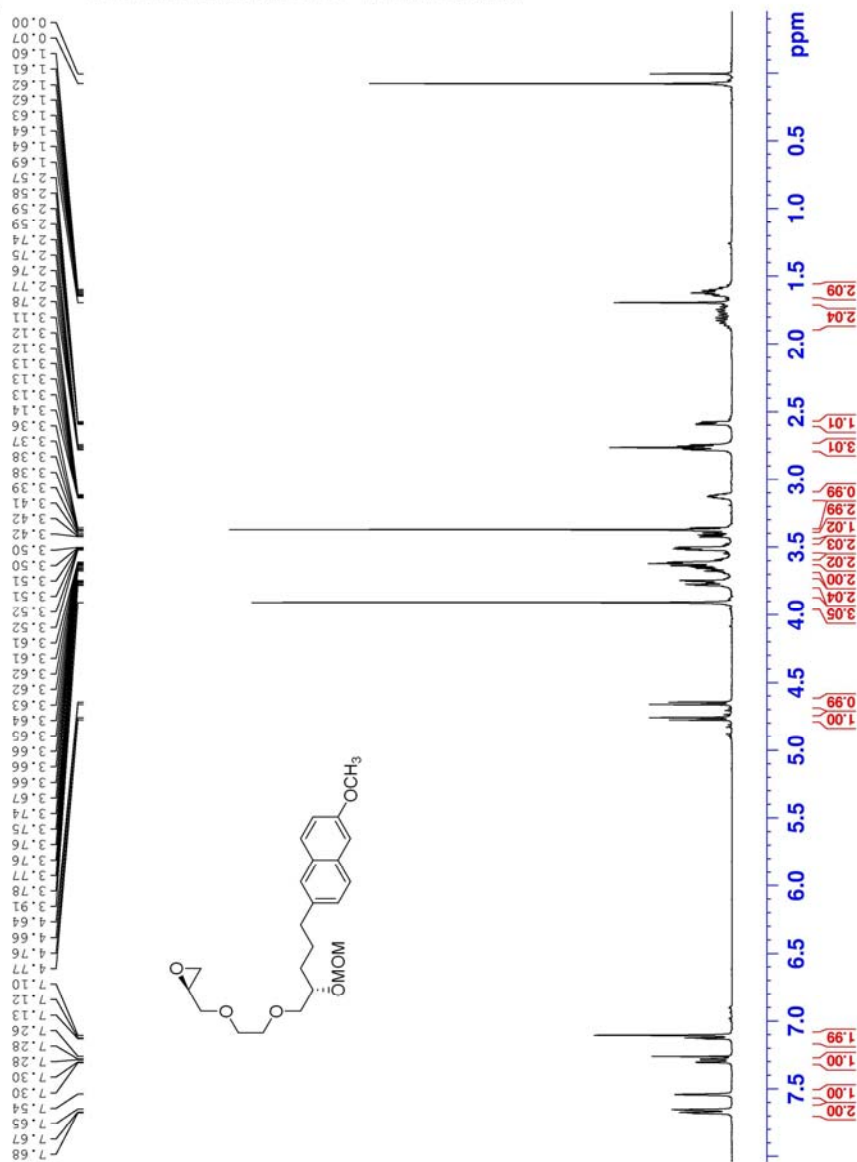

### <sup>1</sup>H NMR spectra of compound **35**

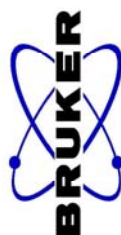

xqc47347

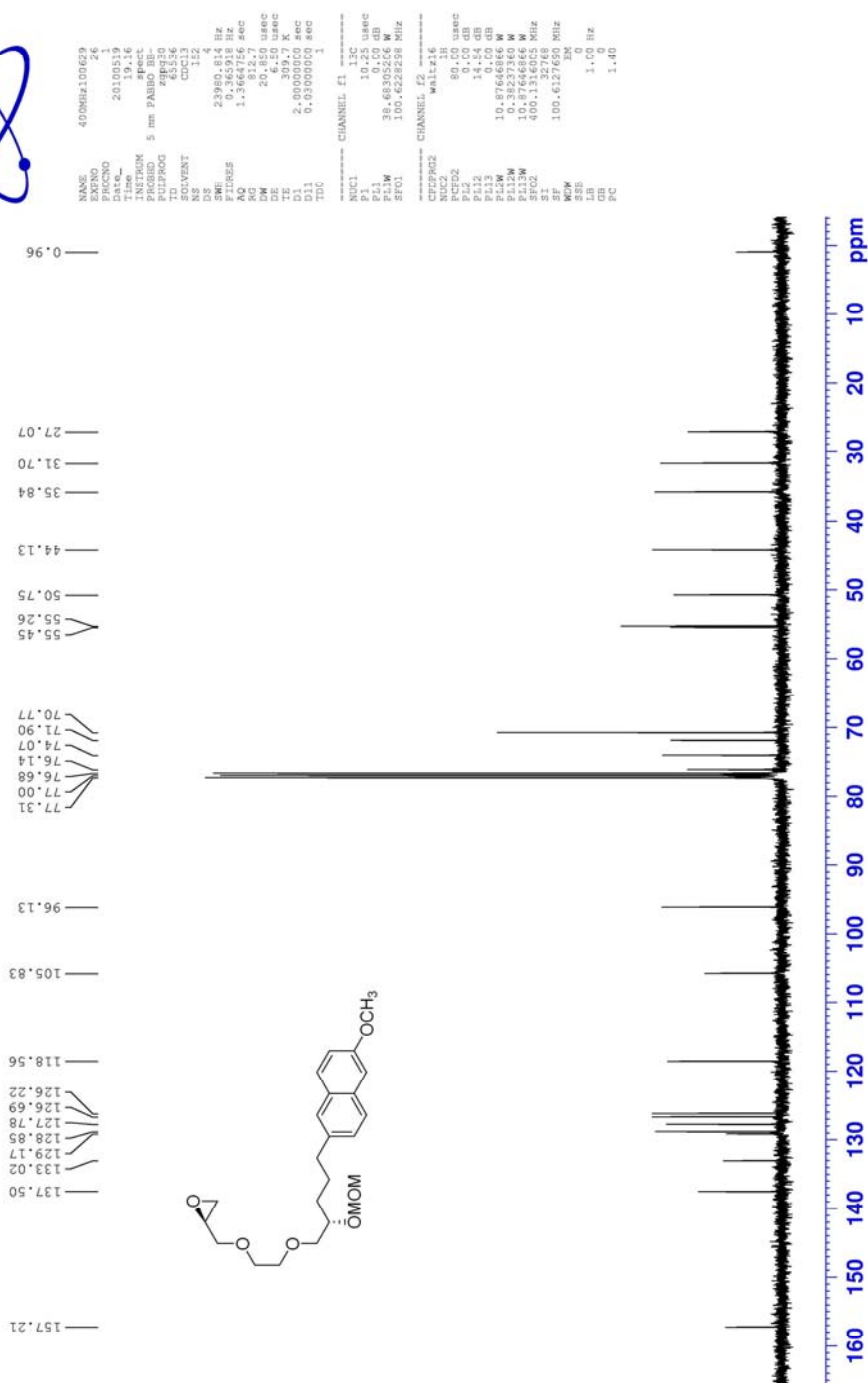

<sup>13</sup>C NMR spectra of compound 35





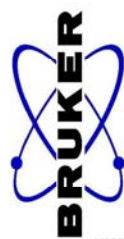

xiaogical-145116

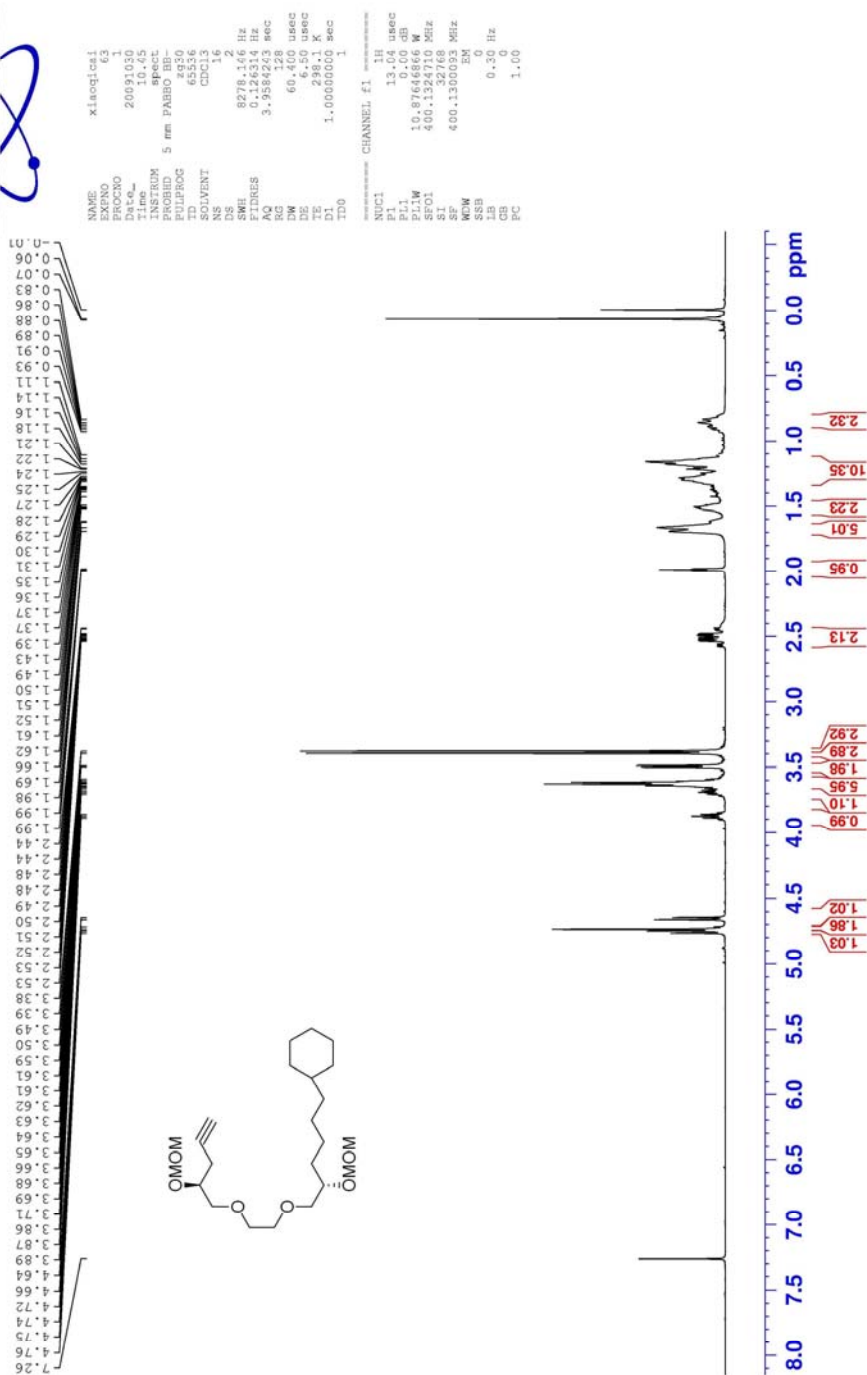

<sup>1</sup>H NMR spectra of compound **37**

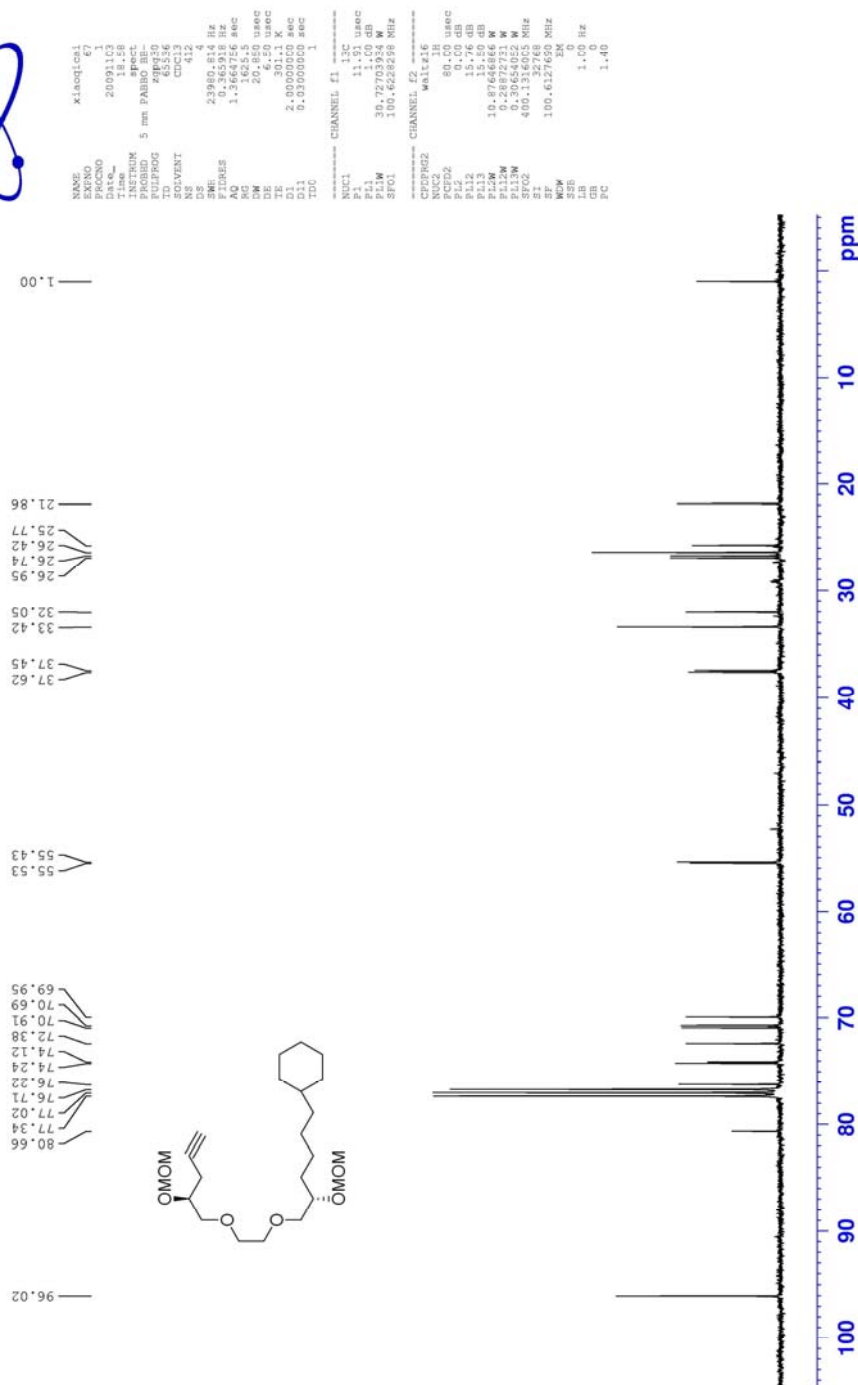



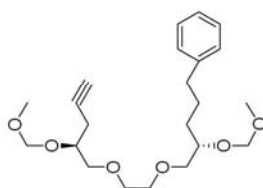

### <sup>1</sup>H NMR spectra of compound **38**

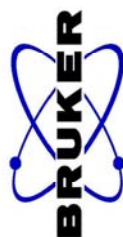

xqc47231

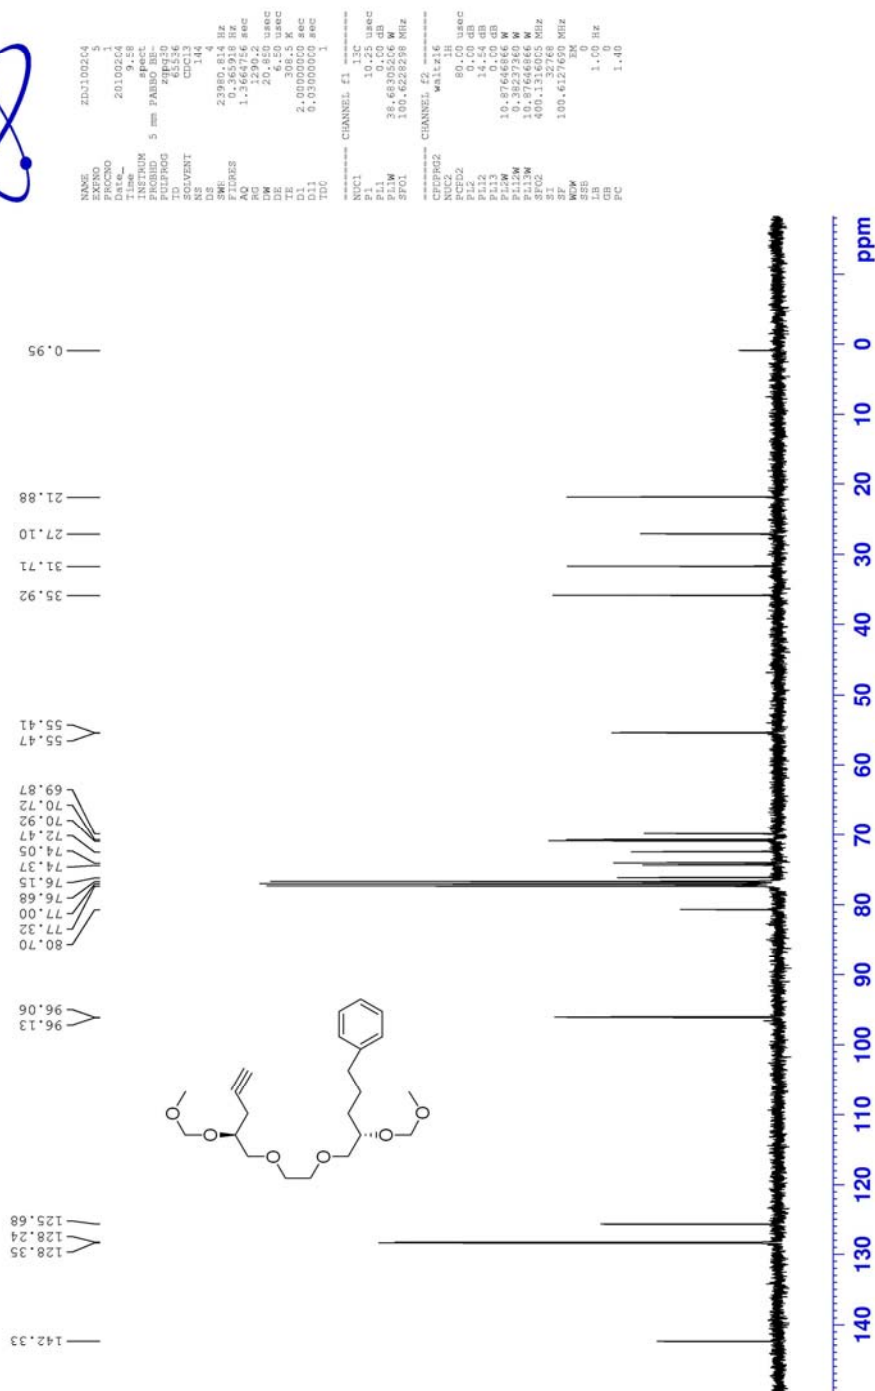

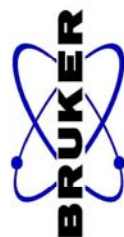

XQC47392

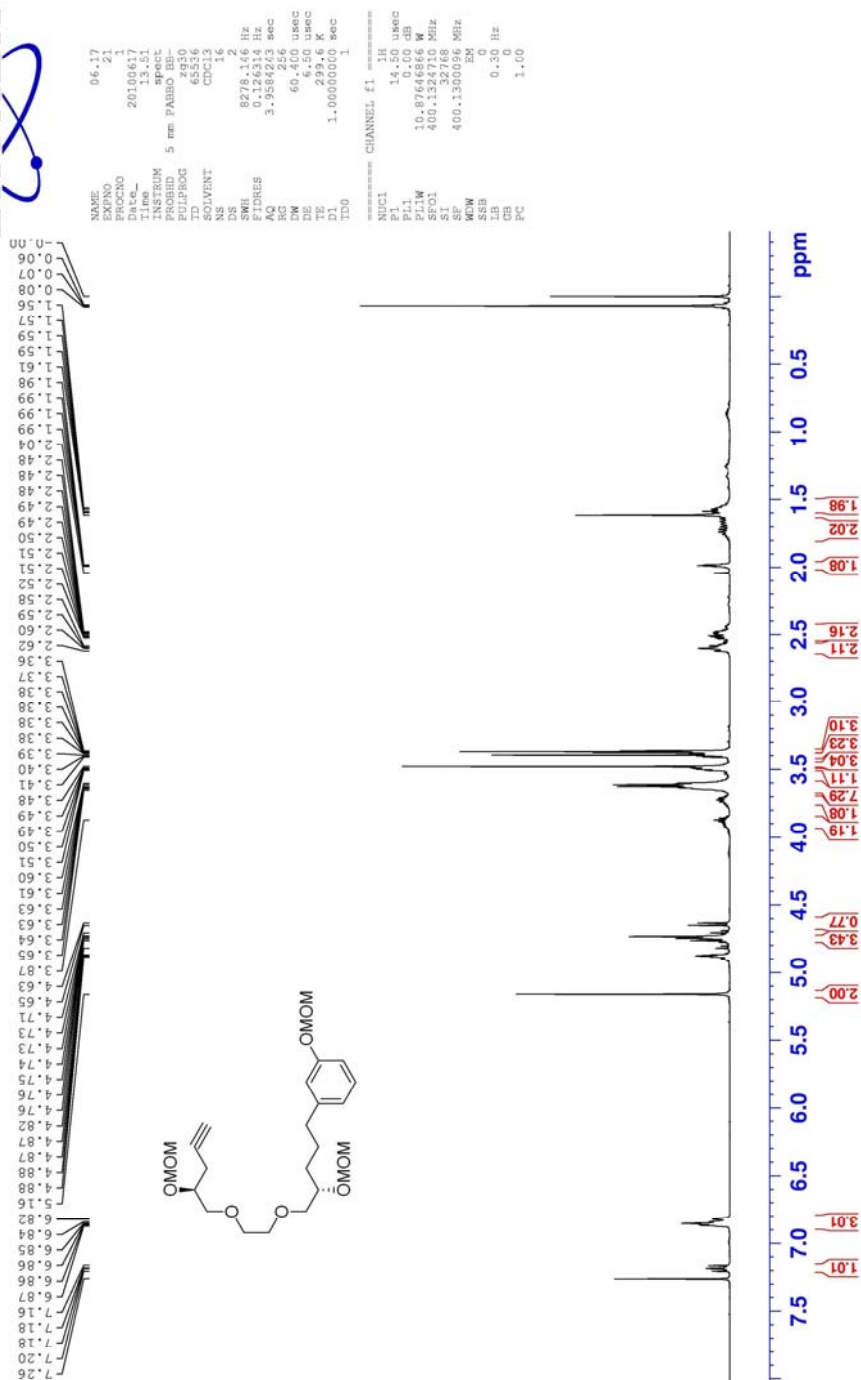

<sup>1</sup>H NMR spectra of compound 39

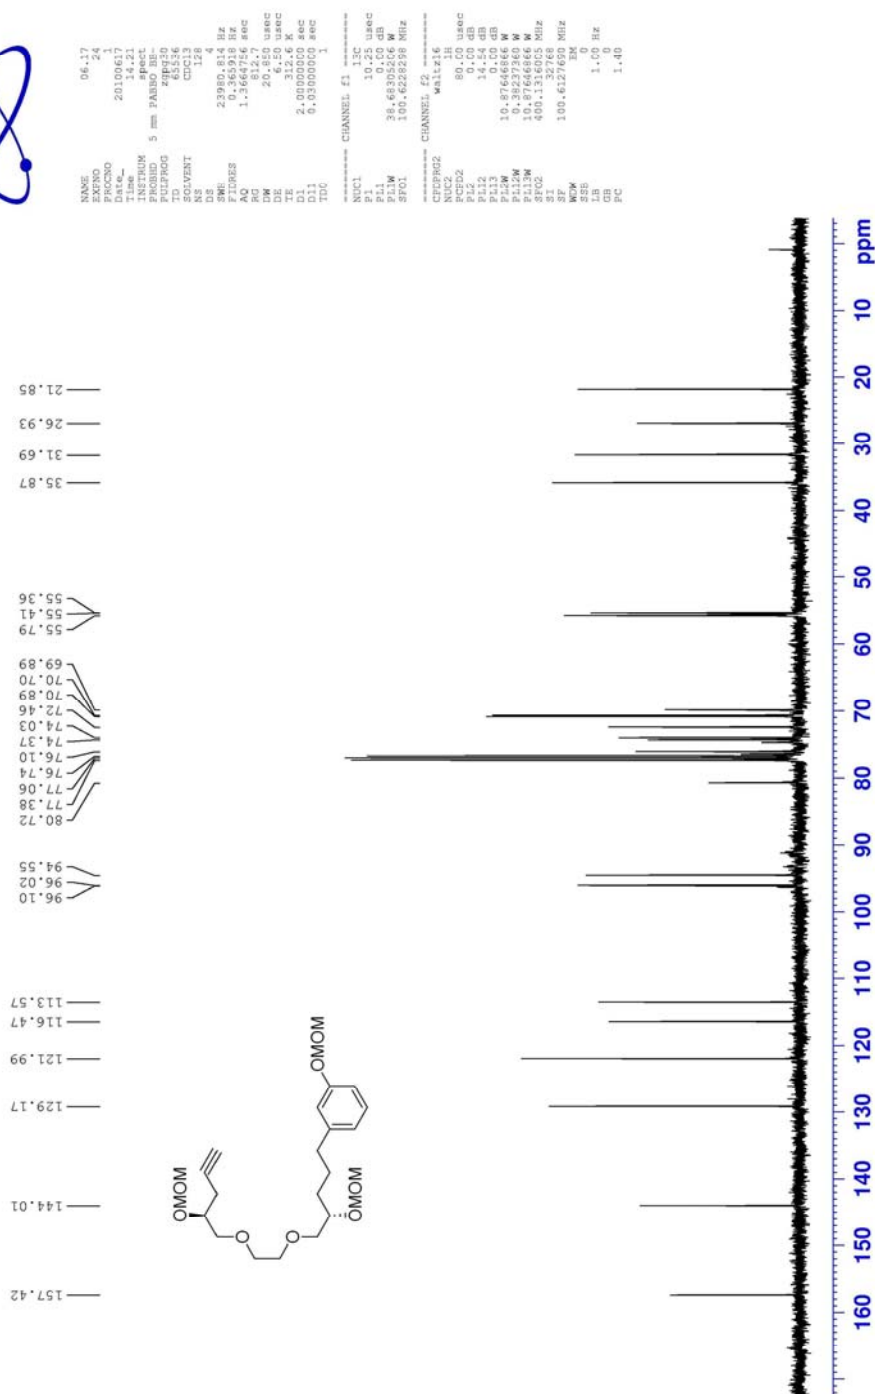 $^{13}\text{C}$  NMR spectra of compound **39**

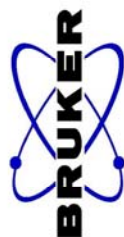

xqc47376

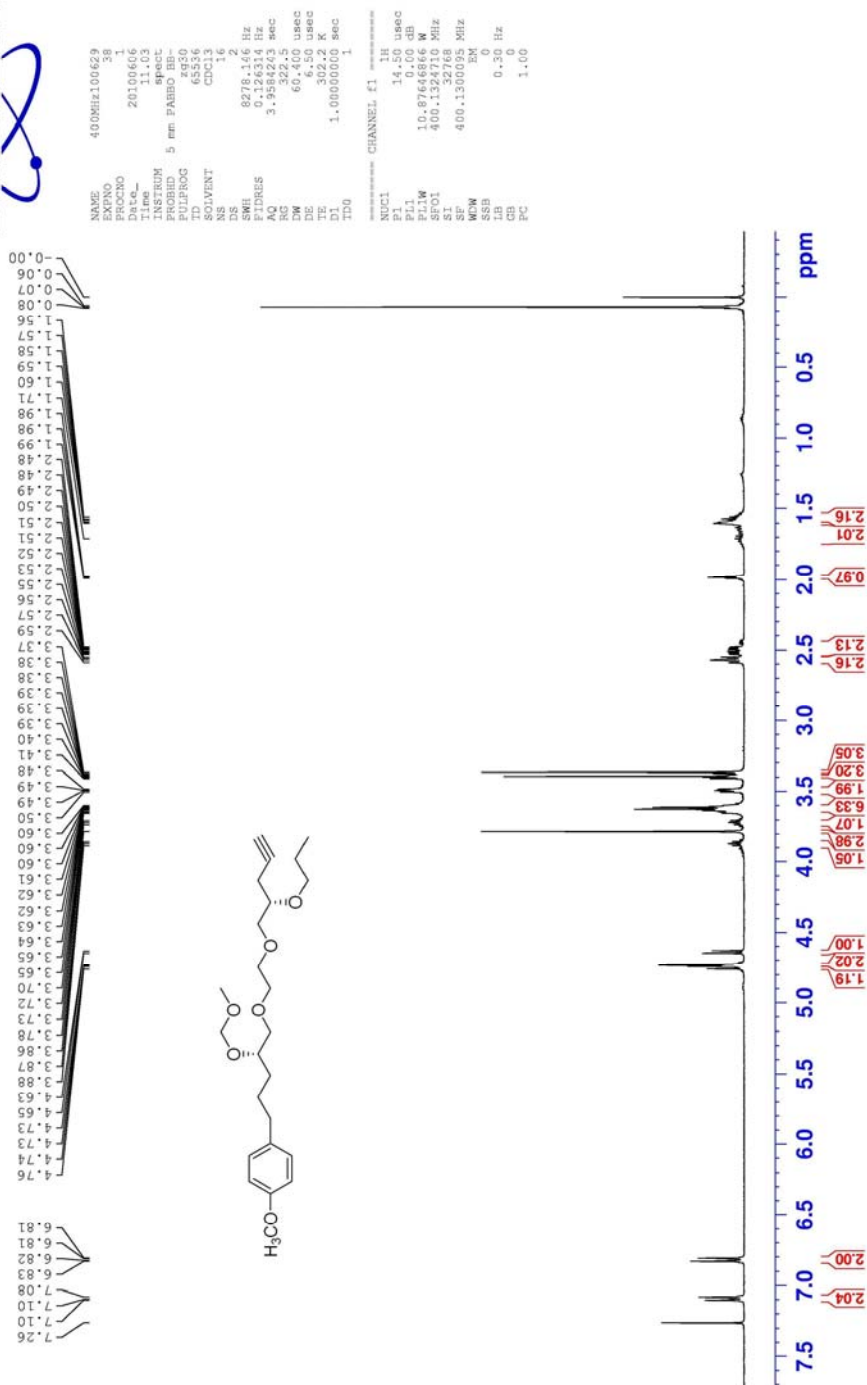

<sup>1</sup>H NMR spectra of compound 40

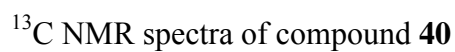

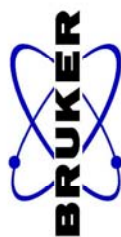

xqc47219

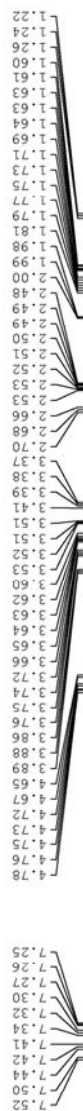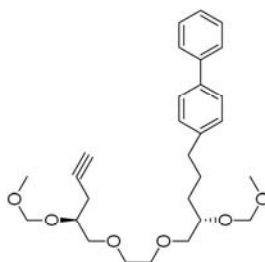

NAME 2DJI002C1  
EXPNO 16  
PROCNO 1  
Date\_ 20100901  
Time 13.59  
INSTRUM spect  
PROBHD 5 mm PABBO BE-  
PULPROG zgpg30  
PROCS 6  
SOLVENT CDCl3  
NS 16  
DS 2  
SWH 8278.146 Hz  
F2 0.7131 Hz  
AQ 3.958423 sec  
RG 71.8  
DM 60.400 usec  
DE 0.550 usec  
TE 297.0 K  
D1 1.00000000 sec  
TD0 1  
===== CHANNEL f1 =====  
NUC1 1H  
P1 14.50 usec  
PL1 0.00 dB  
PR1 10.87 dB  
PC1 10.87 dB  
SCA 400.132760 MHz  
SI 32768  
SF 400.1300102 MHz  
WDW EM  
SSB 0  
GB 0  
PC 1.00

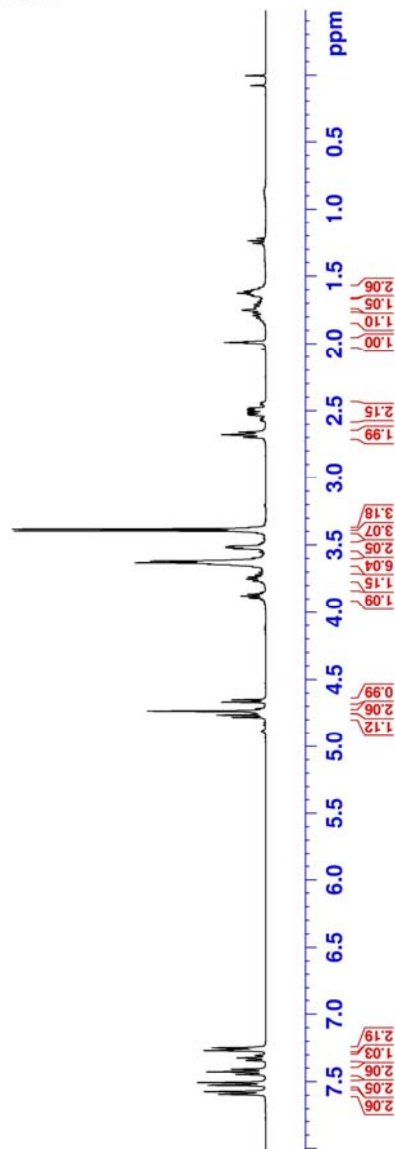

$^1\text{H}$  NMR spectra of compound **41**

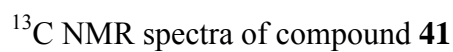



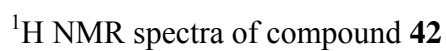

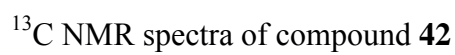

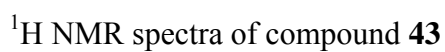



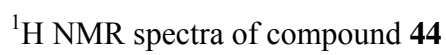

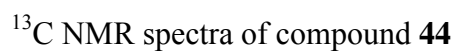

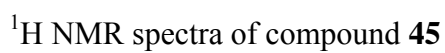

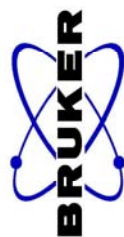

xiaocqicai-47242

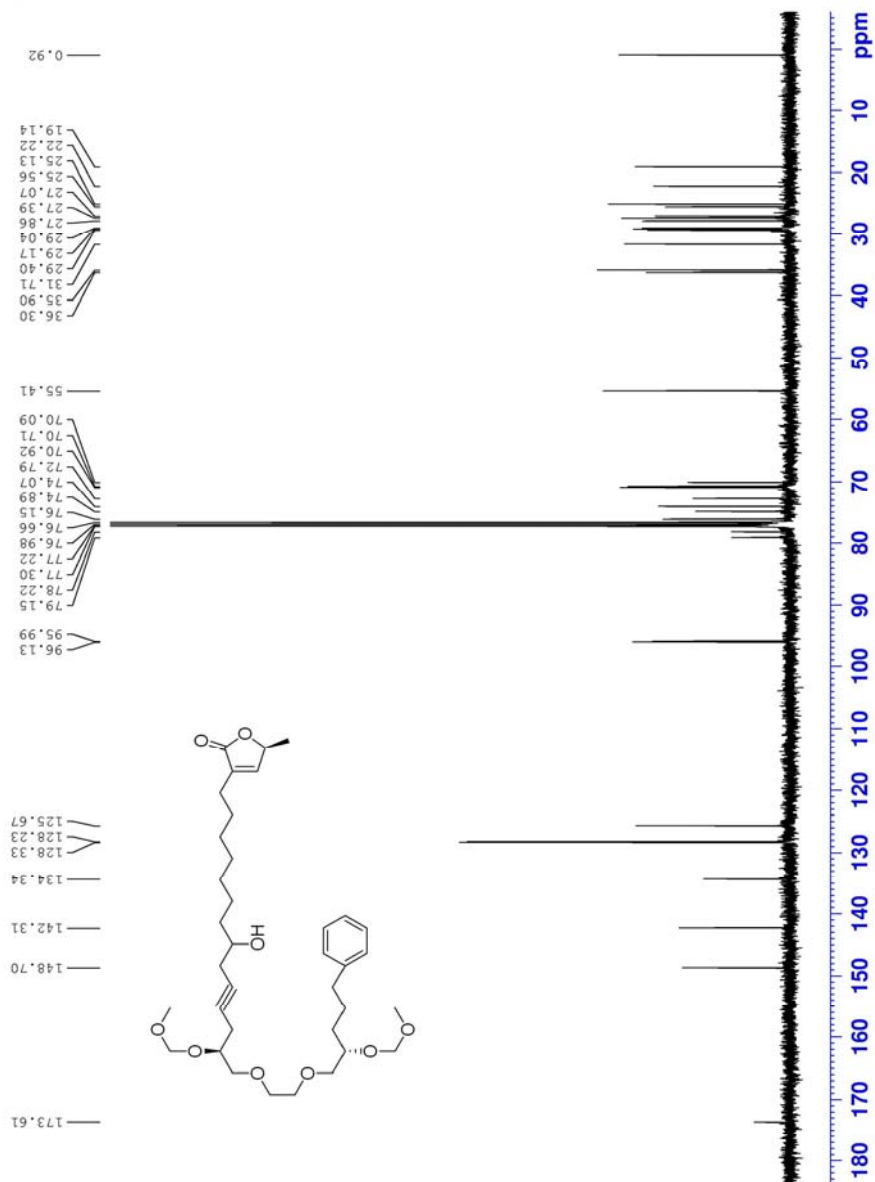

<sup>13</sup>C NMR spectra of compound 45



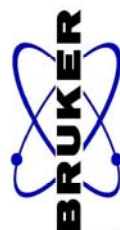

xqc47393

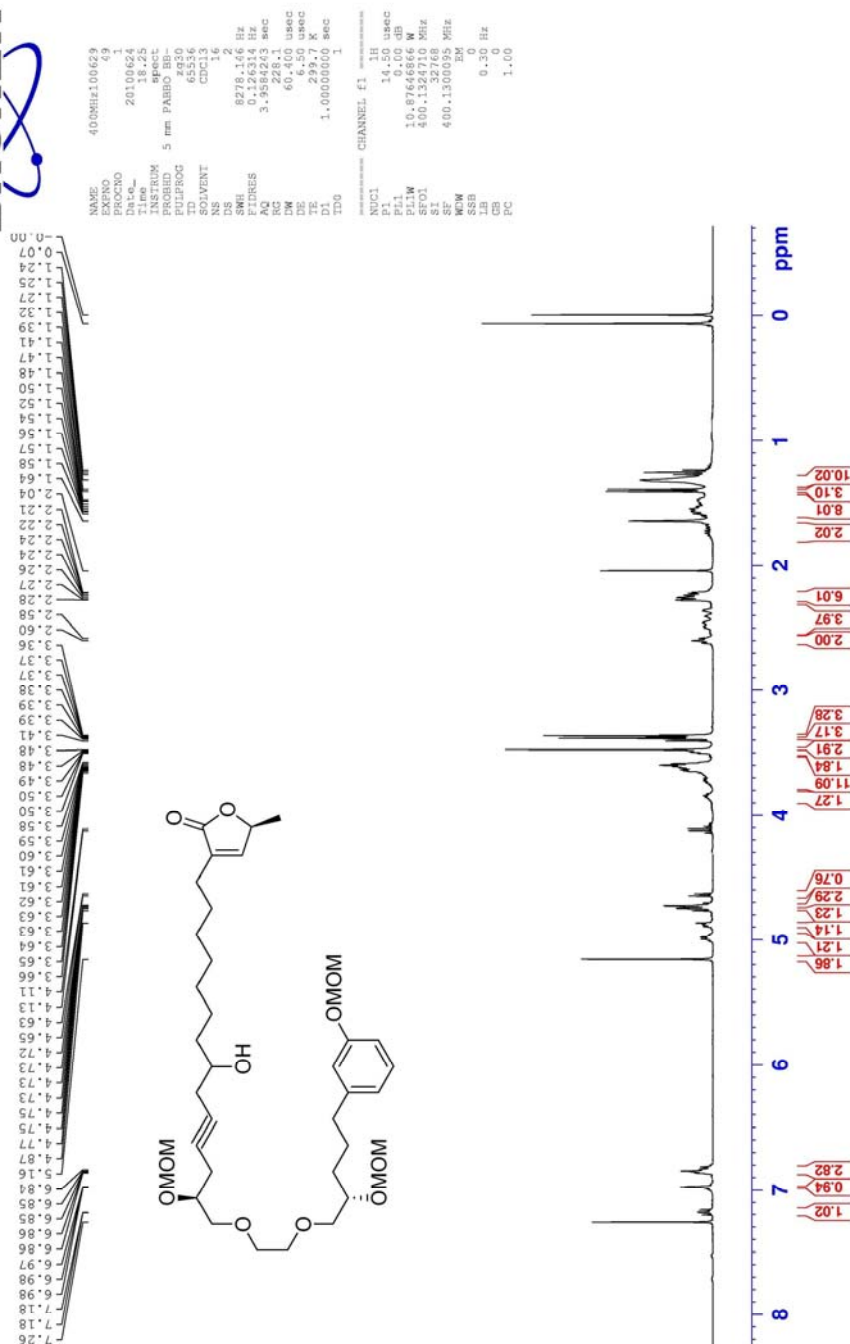

<sup>1</sup>H NMR spectra of compound 46

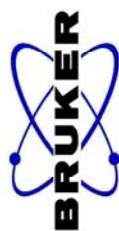

xqc47393

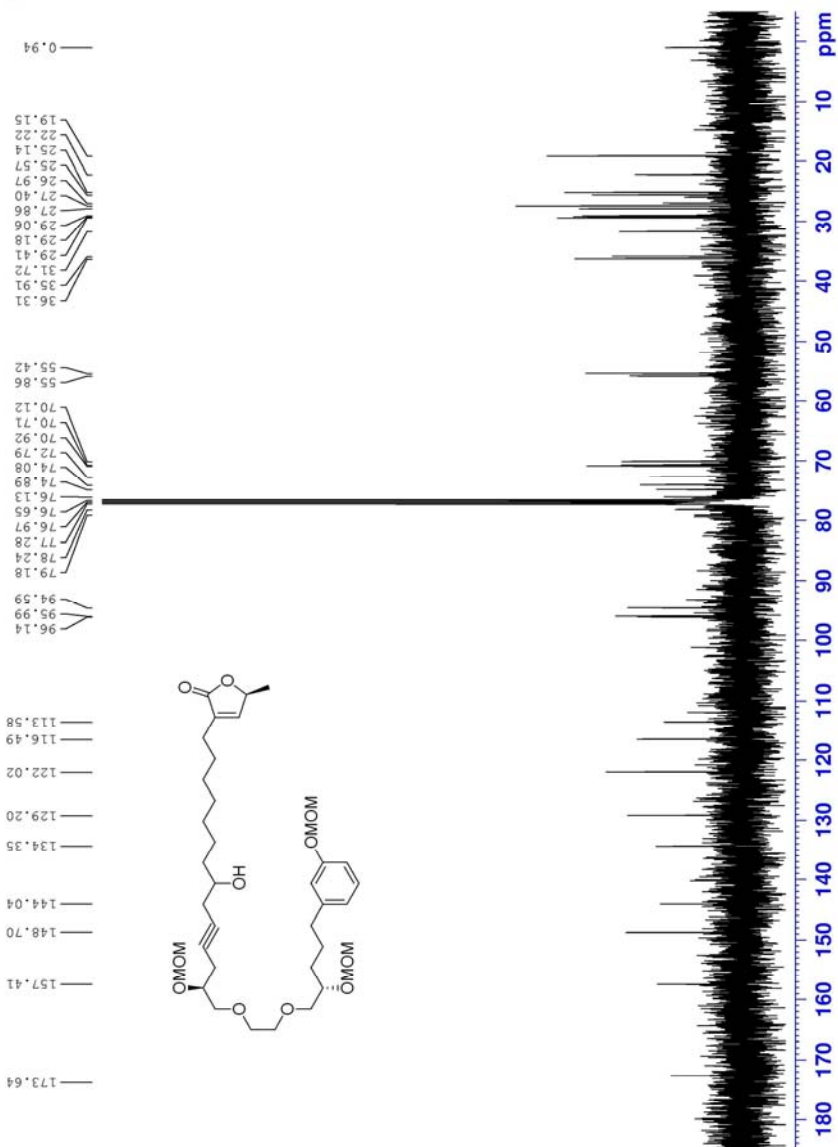

<sup>13</sup>C NMR spectra of compound 46

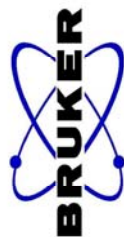

xqc47382

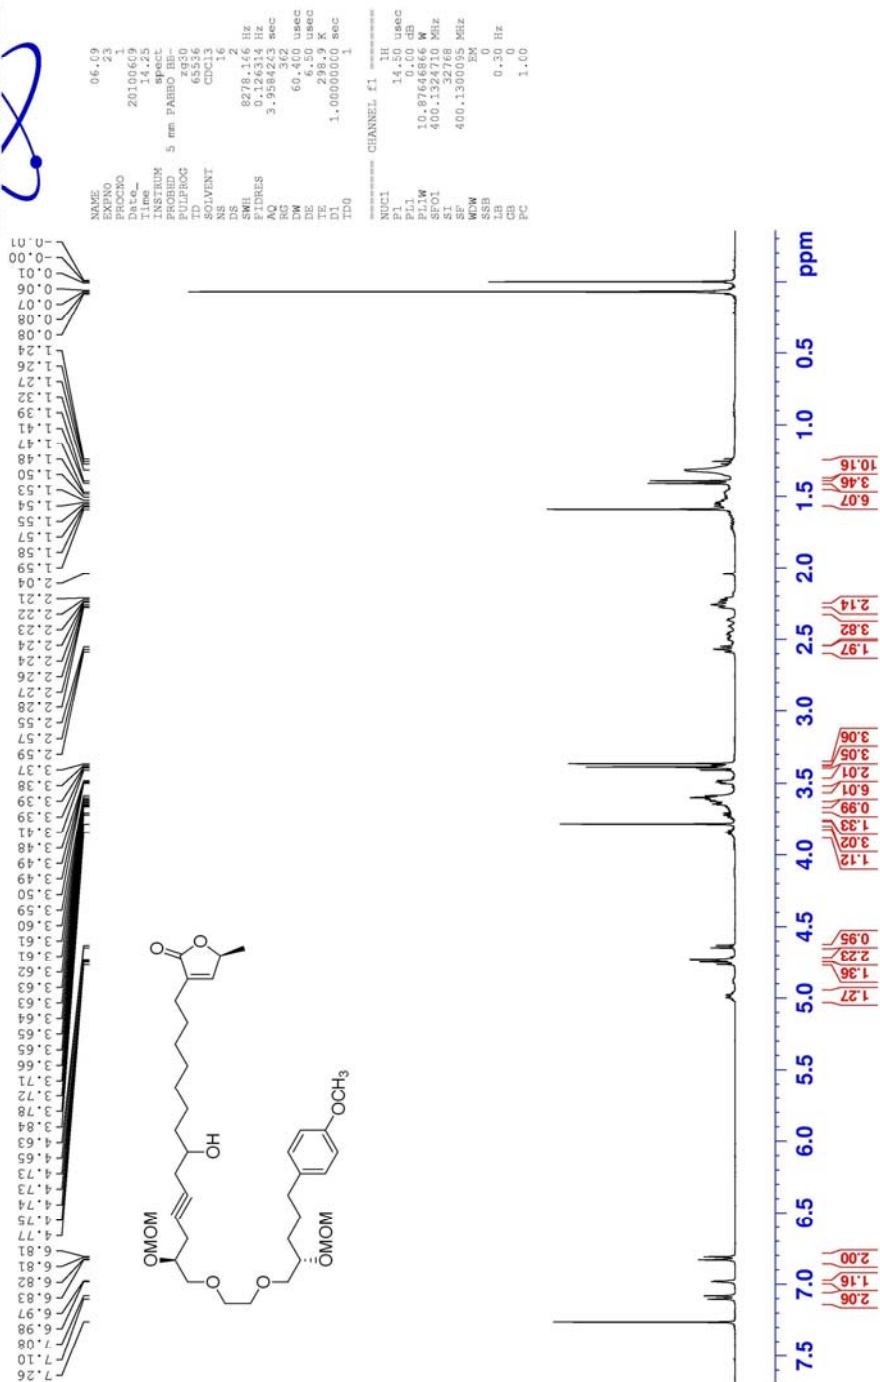

<sup>1</sup>H NMR spectra of compound 47

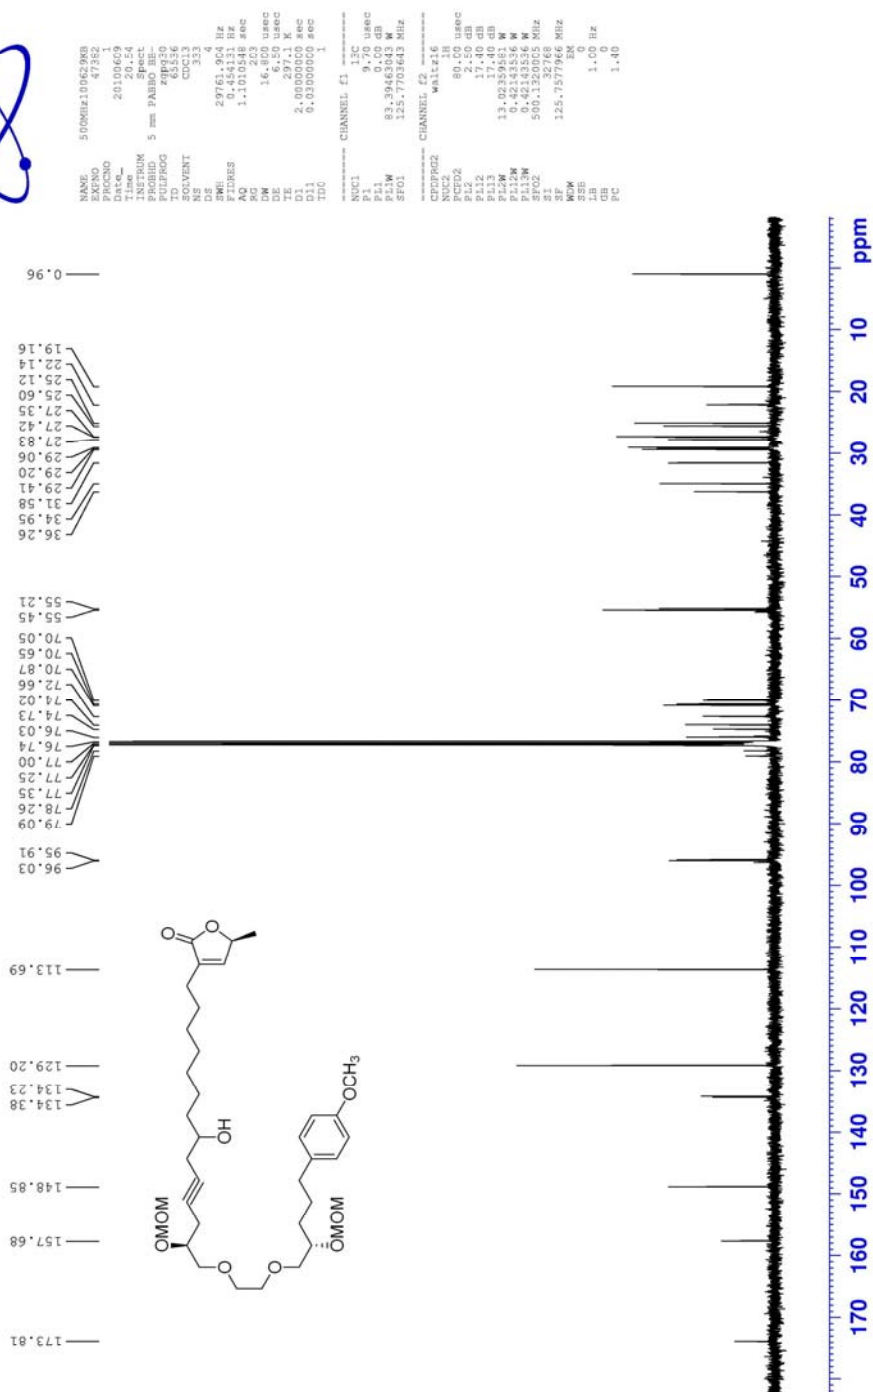

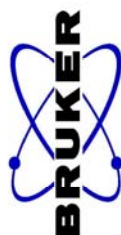

xiaocqicai-47245

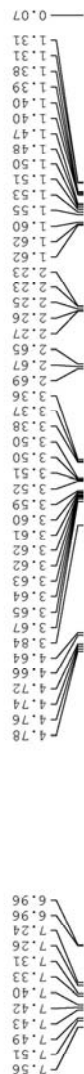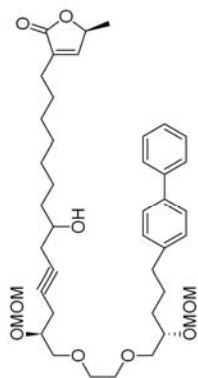

NAME xiaocqicai  
EXPNO 121  
PROCNO 1  
Date\_ 20180908  
Time 14.11  
INSTRUM spect  
PROBHD 5 mm PABBO BB-  
PULPROG zgpg30  
TD 65536  
SOLVENT CDCl3  
NS 16  
DS 2  
SWH 8278.346 Hz  
F2 0.718441 MHz  
AQ 3.9558423 sec  
RG 71.8  
DM 60.400 usec  
DE 14.50 usec  
TE 29.9  
D1 1.00000000 sec  
TD0 1  
CHANNEL f1  
NUC1 1H  
P1 14.50 usec  
PL1 0.00 dB  
PL12 0.00 dB  
PC12 0.00 dB  
SFO 400.132768 MHz  
SI 32768  
SF 400.1320093 MHz  
WDW EM  
SSB 0  
GB 0  
PC 1.00

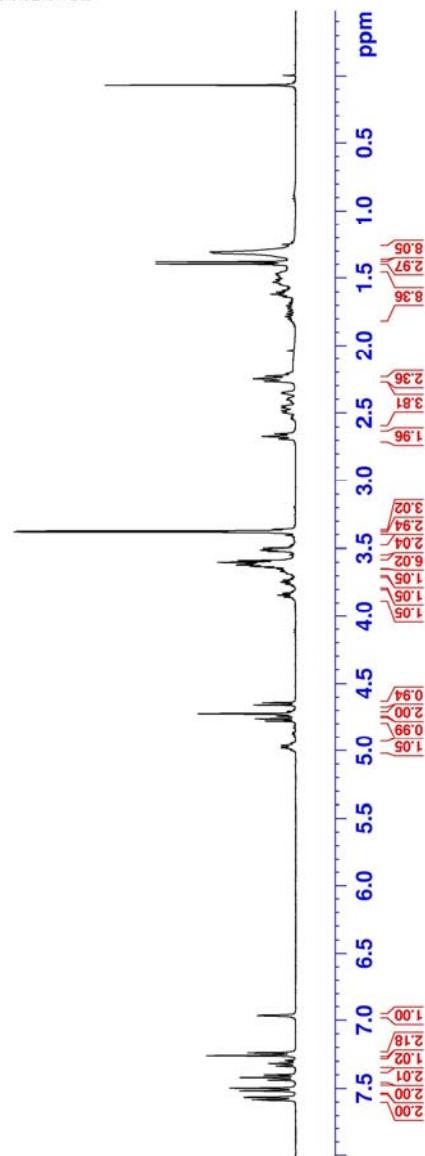

<sup>1</sup>H NMR spectra of compound 48

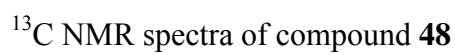

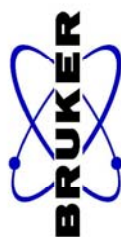

xqc47381

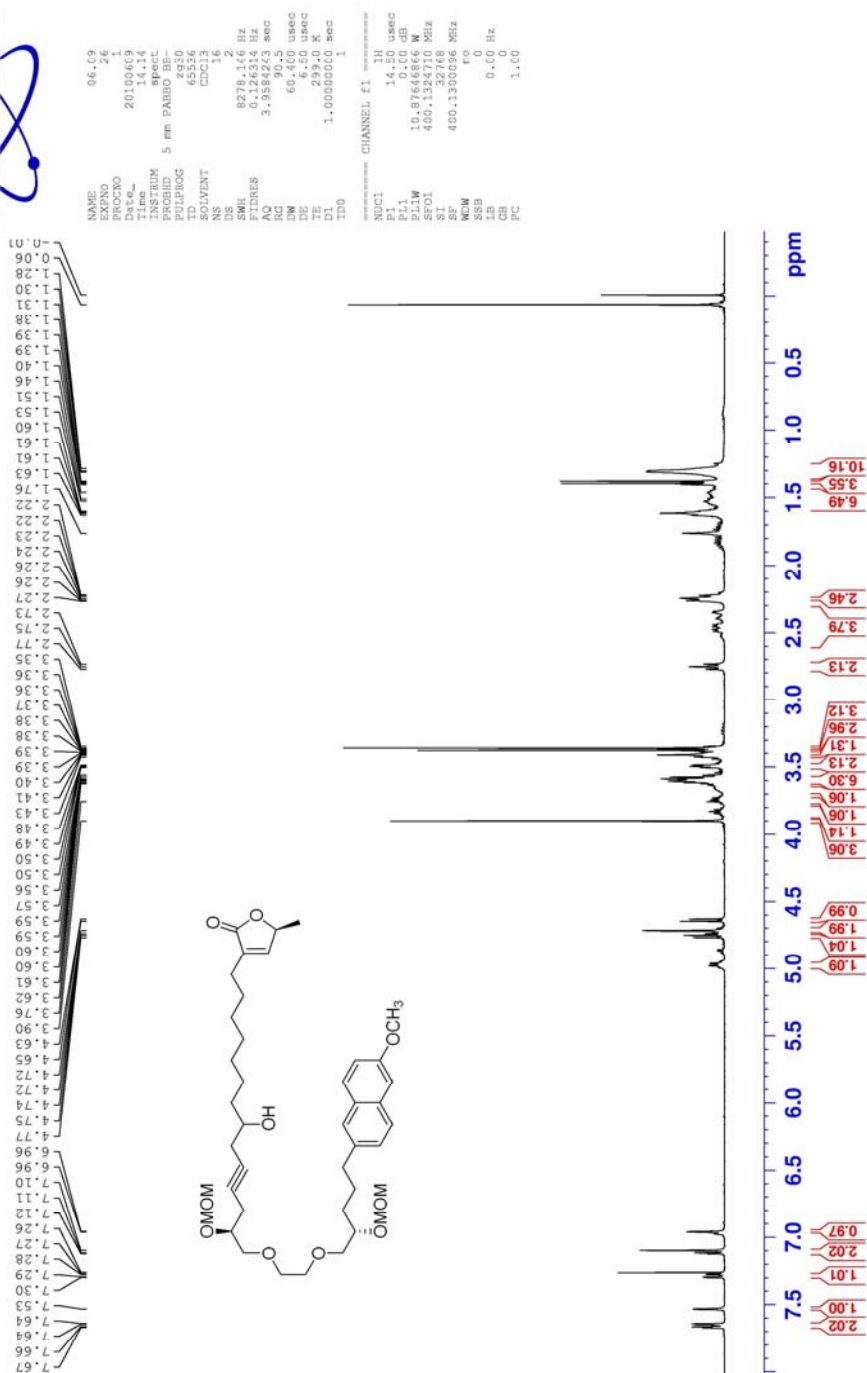

<sup>1</sup>H NMR spectra of compound 49

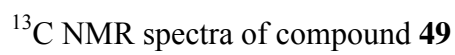



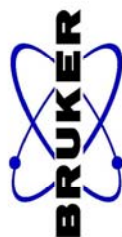

xqc47238

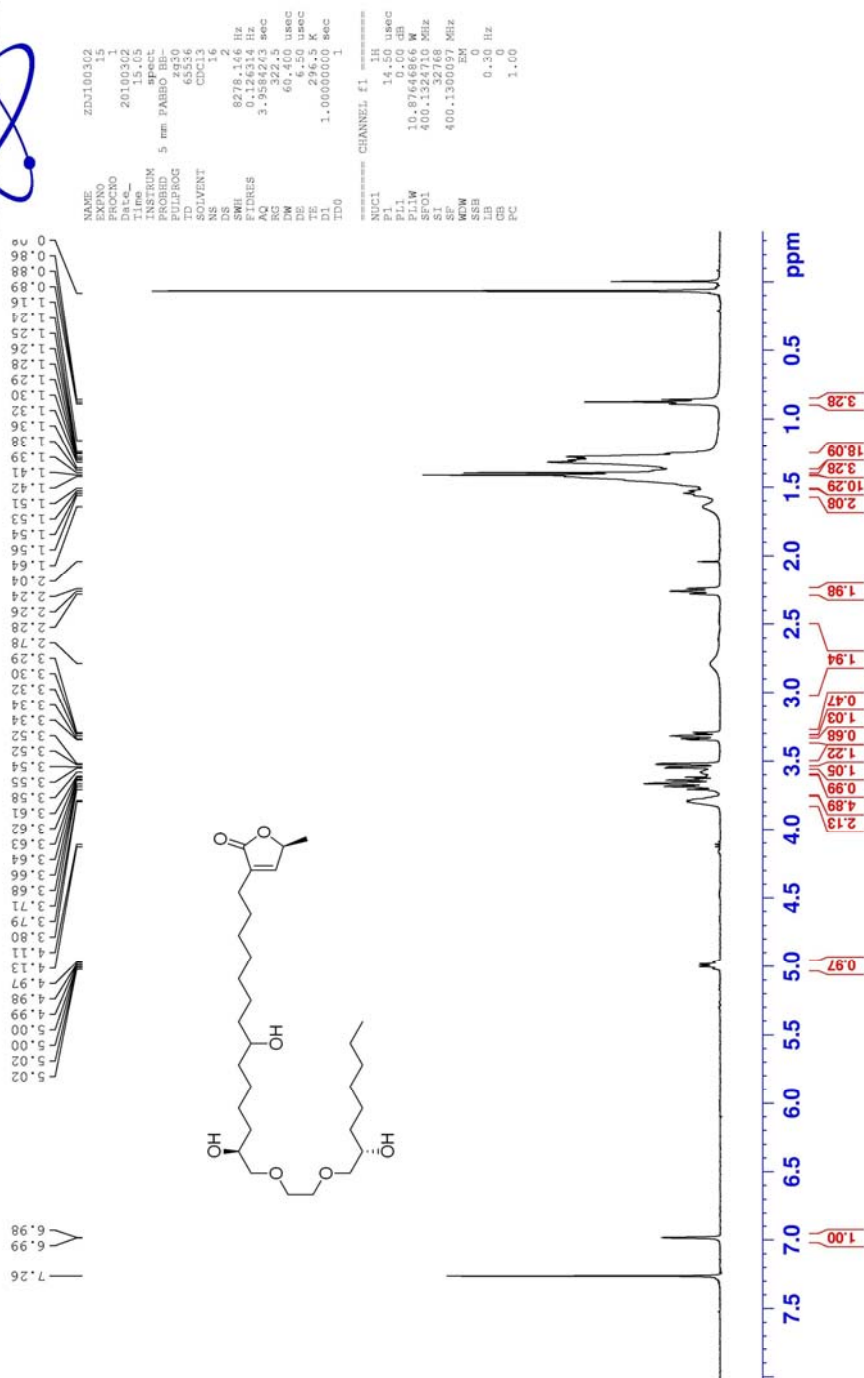

<sup>1</sup>H NMR spectra of compound 2

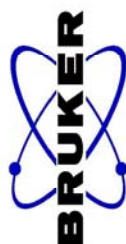

xqc47238

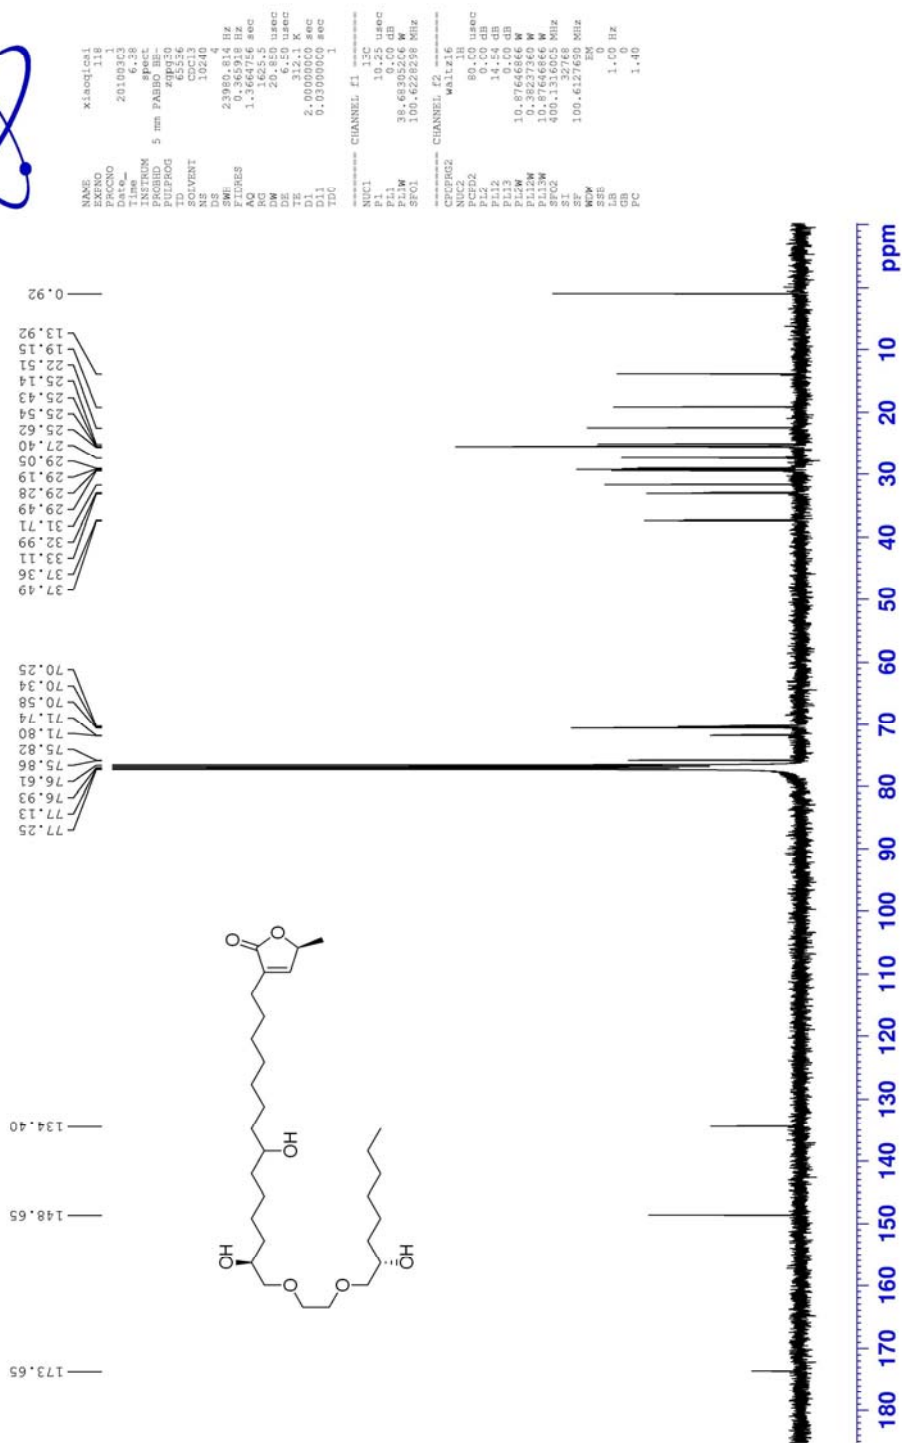

$^{13}\text{C}$  NMR spectra of compound 2

xqc47289

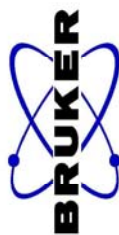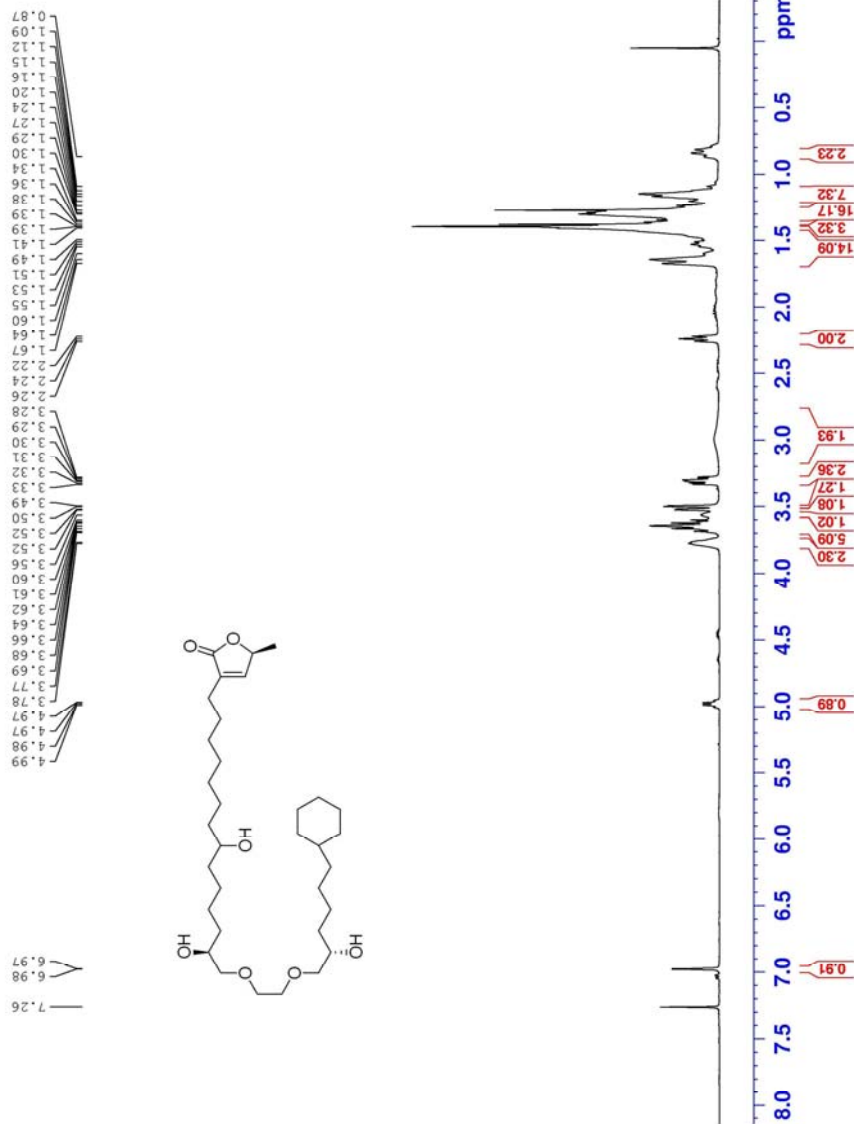

<sup>1</sup>H NMR spectra of compound 3

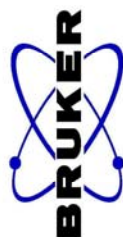

xqc47289

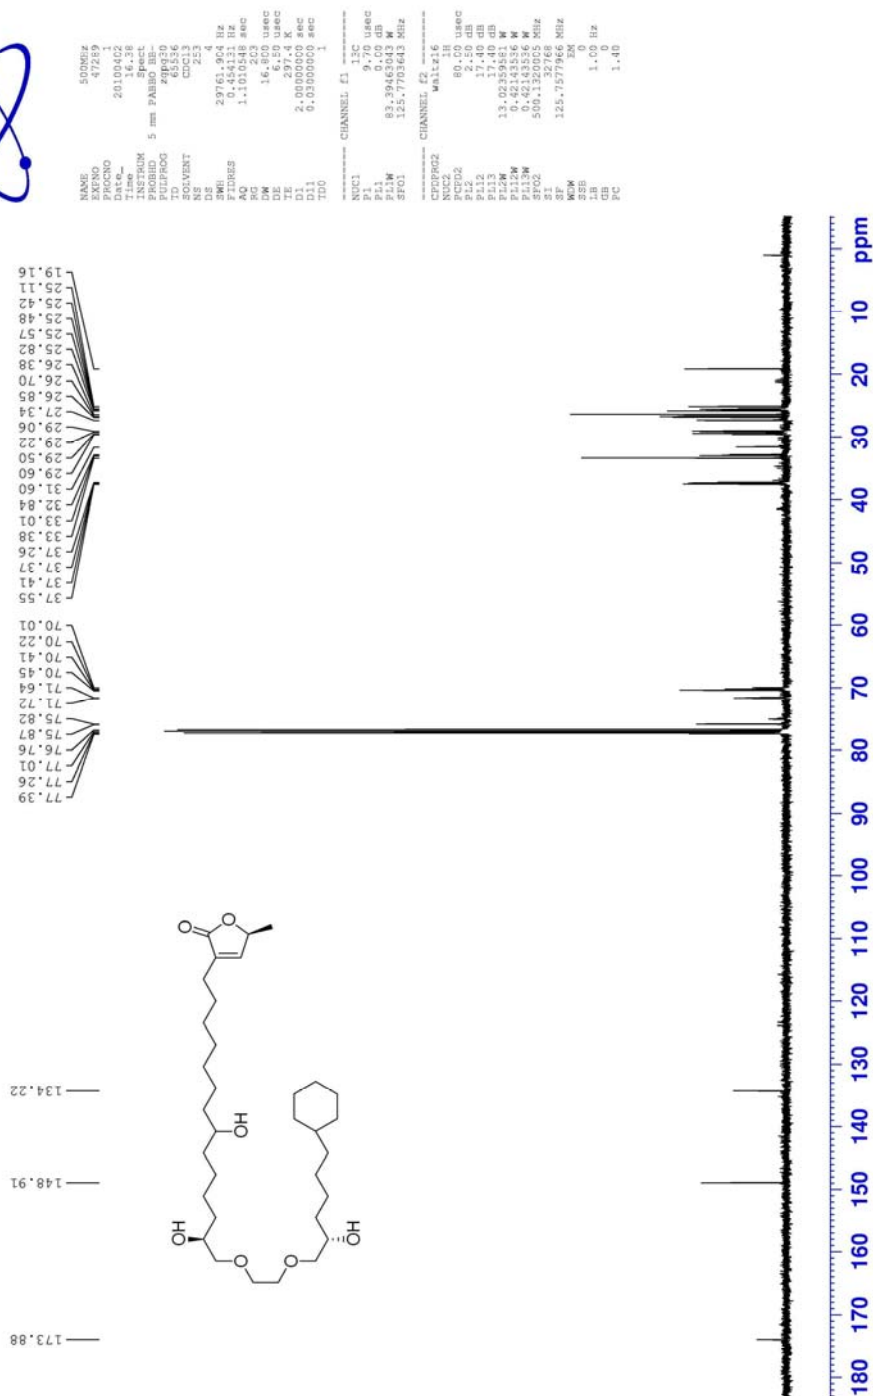

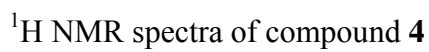

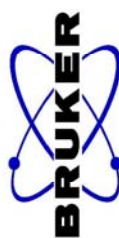

xqc47261

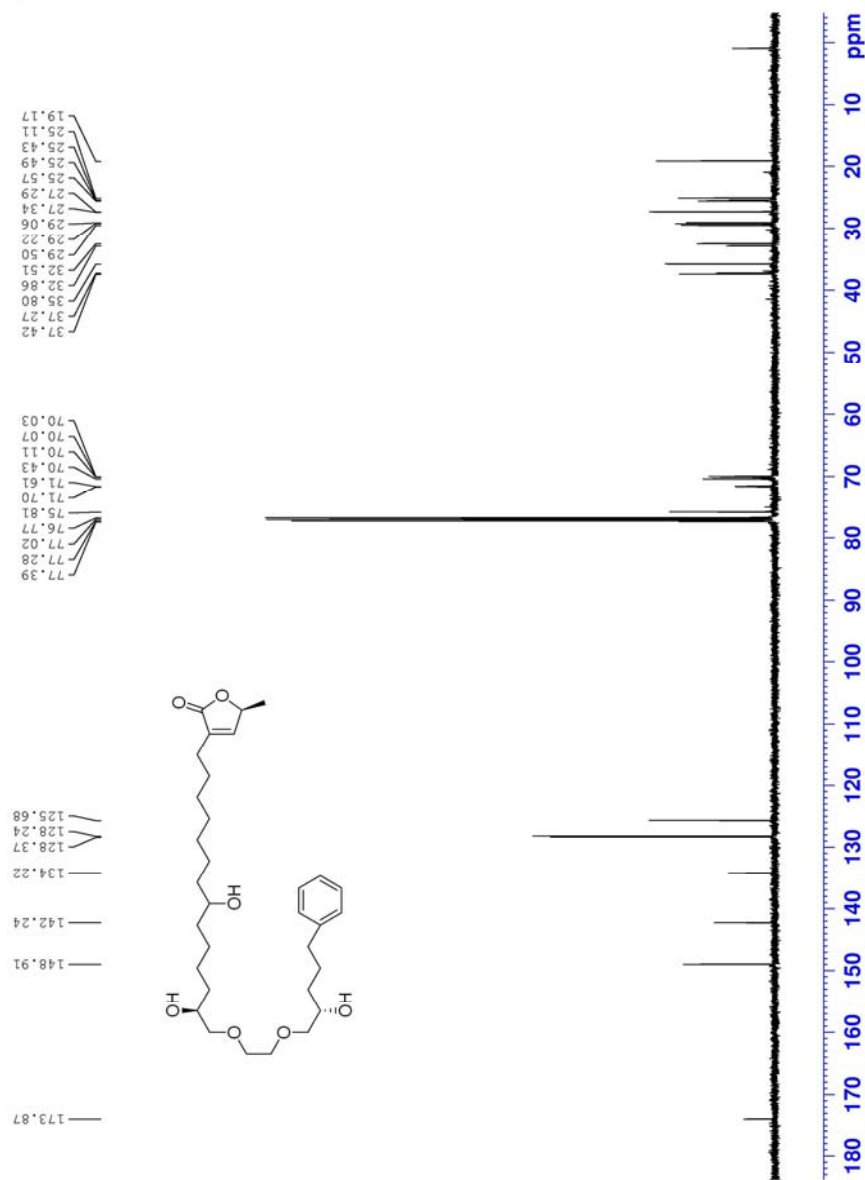

<sup>13</sup>C NMR spectra of compound 4

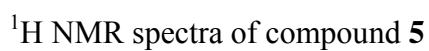

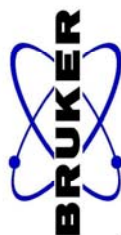

xqc47395

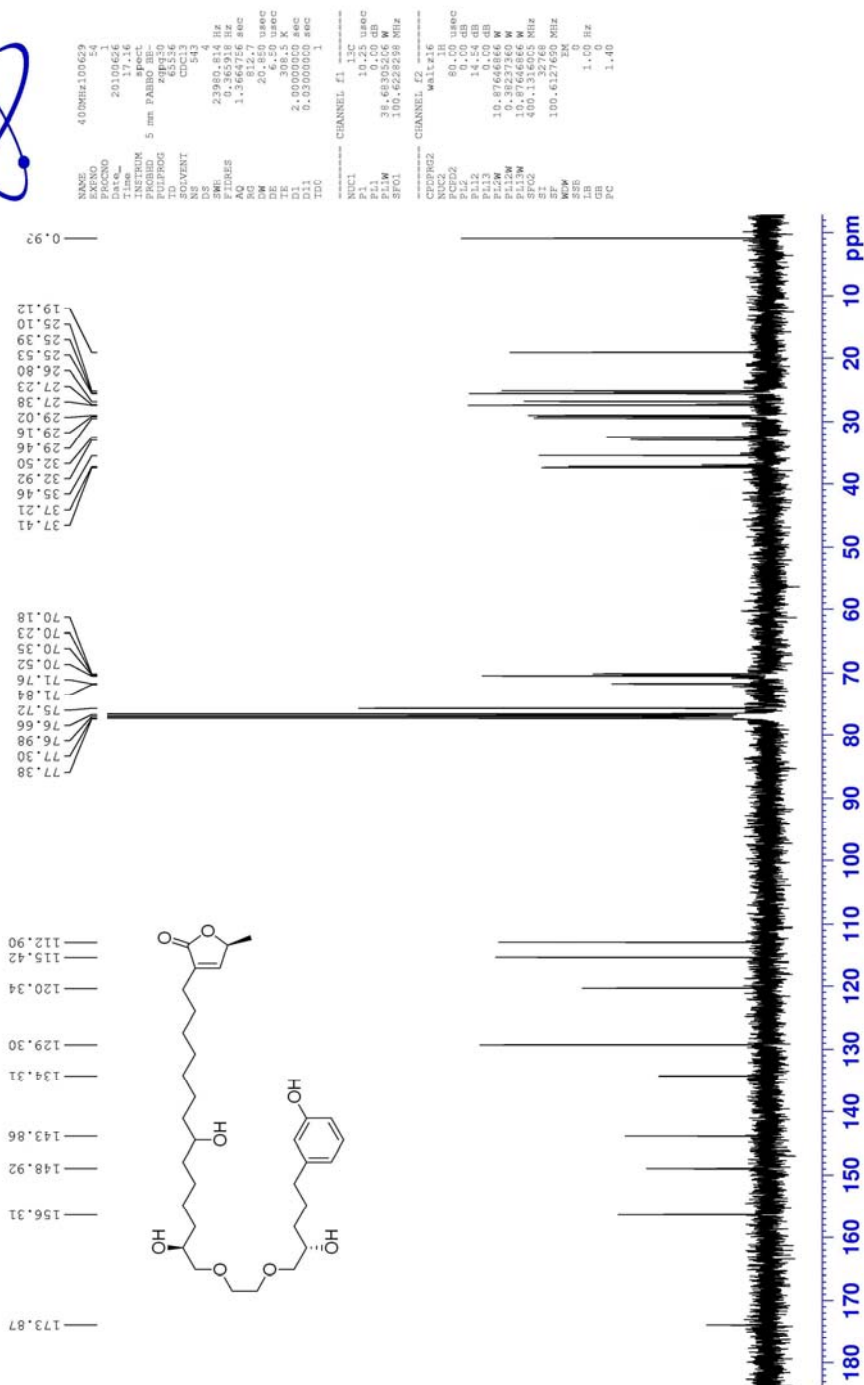

<sup>13</sup>C NMR spectra of compound 5



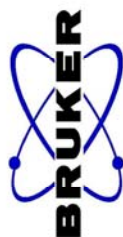

xqc47396

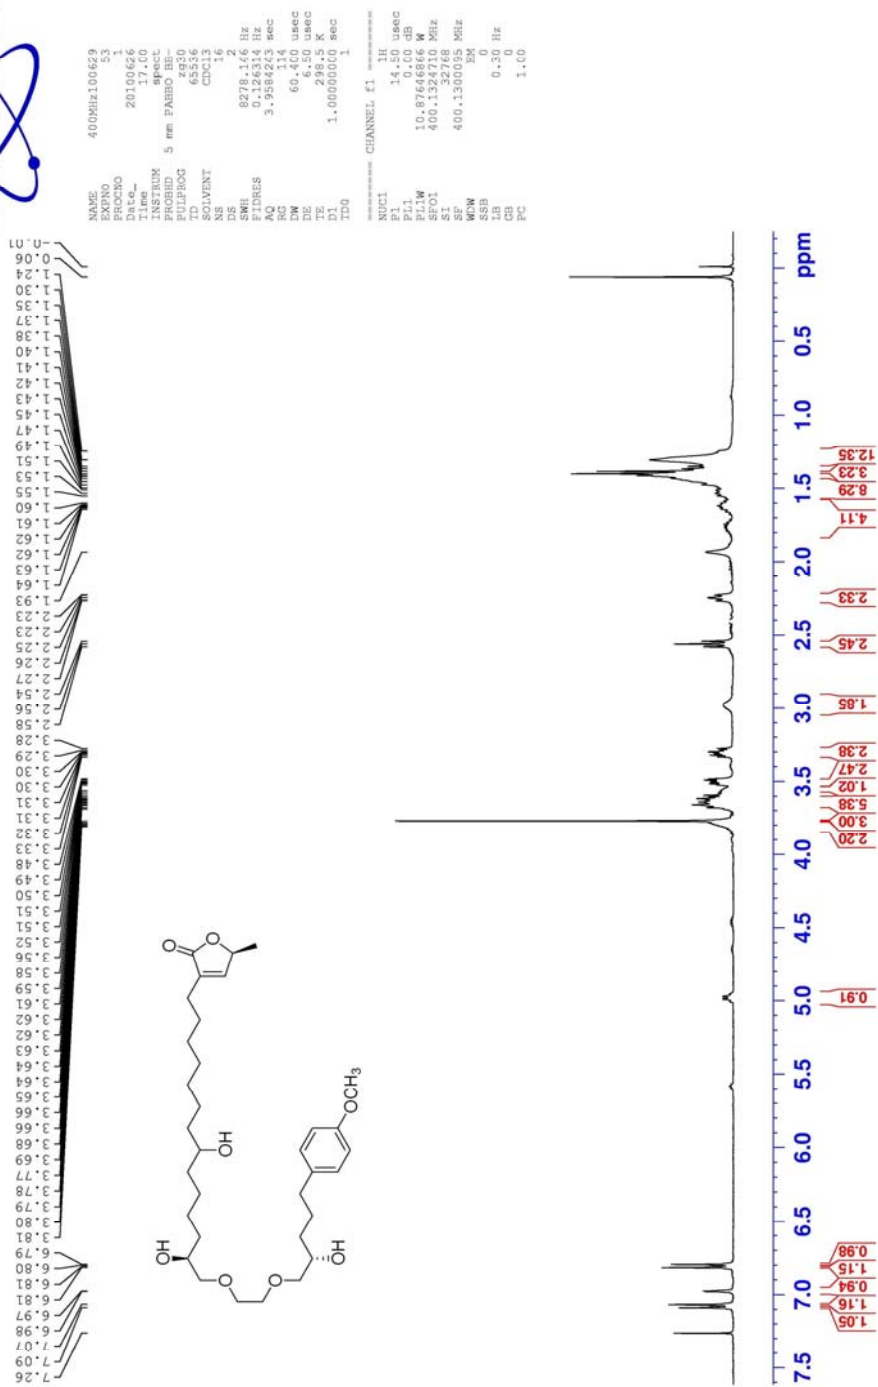

$^1\text{H}$  NMR spectra of compound 6

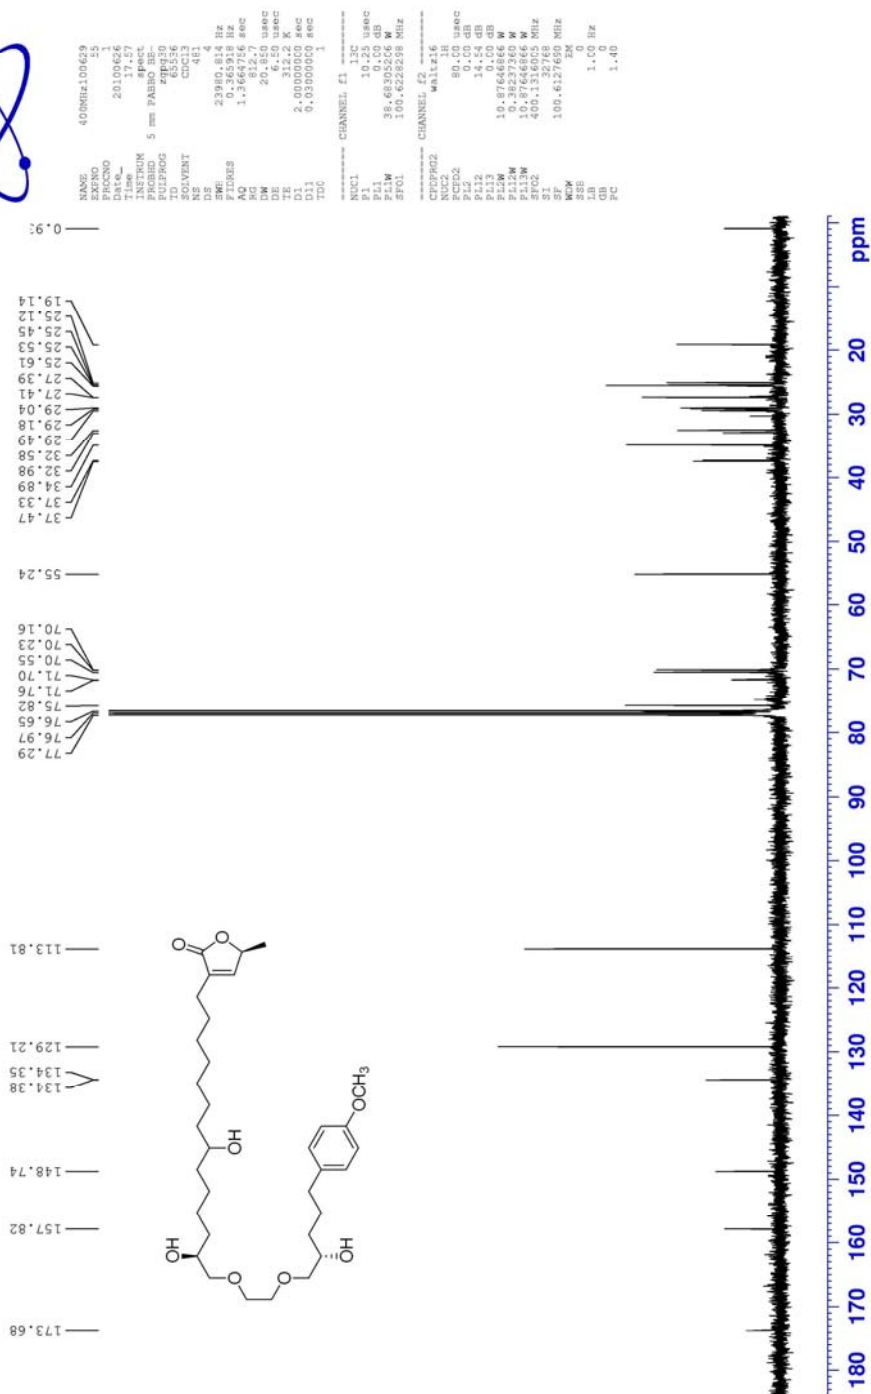<sup>13</sup>C NMR spectra of compound **6**

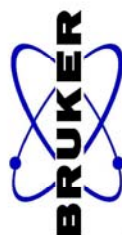

xiaogicai-47257

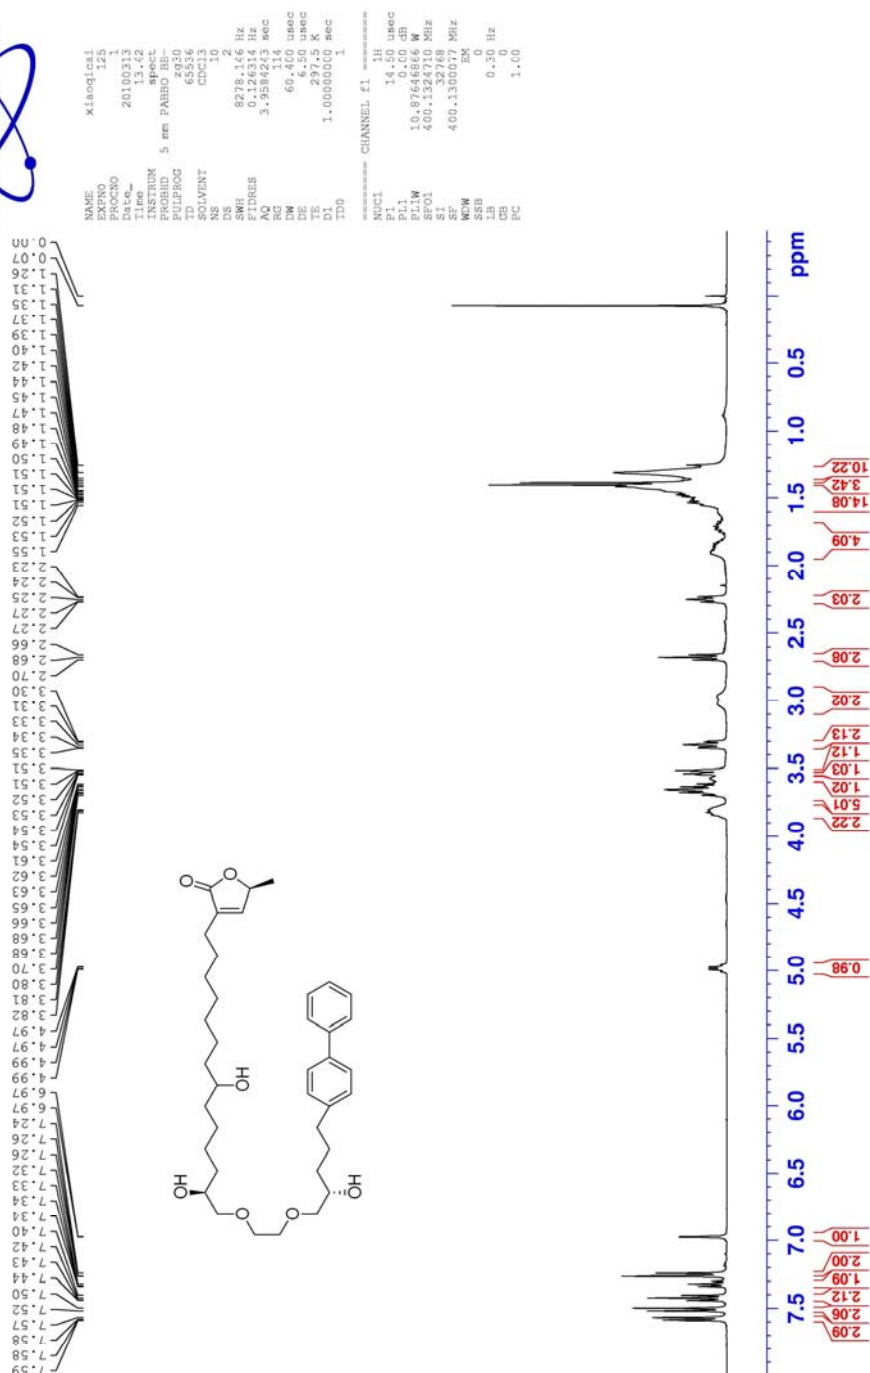

<sup>1</sup>H NMR spectra of compound 7

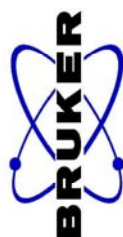

xiaoqicai-47257

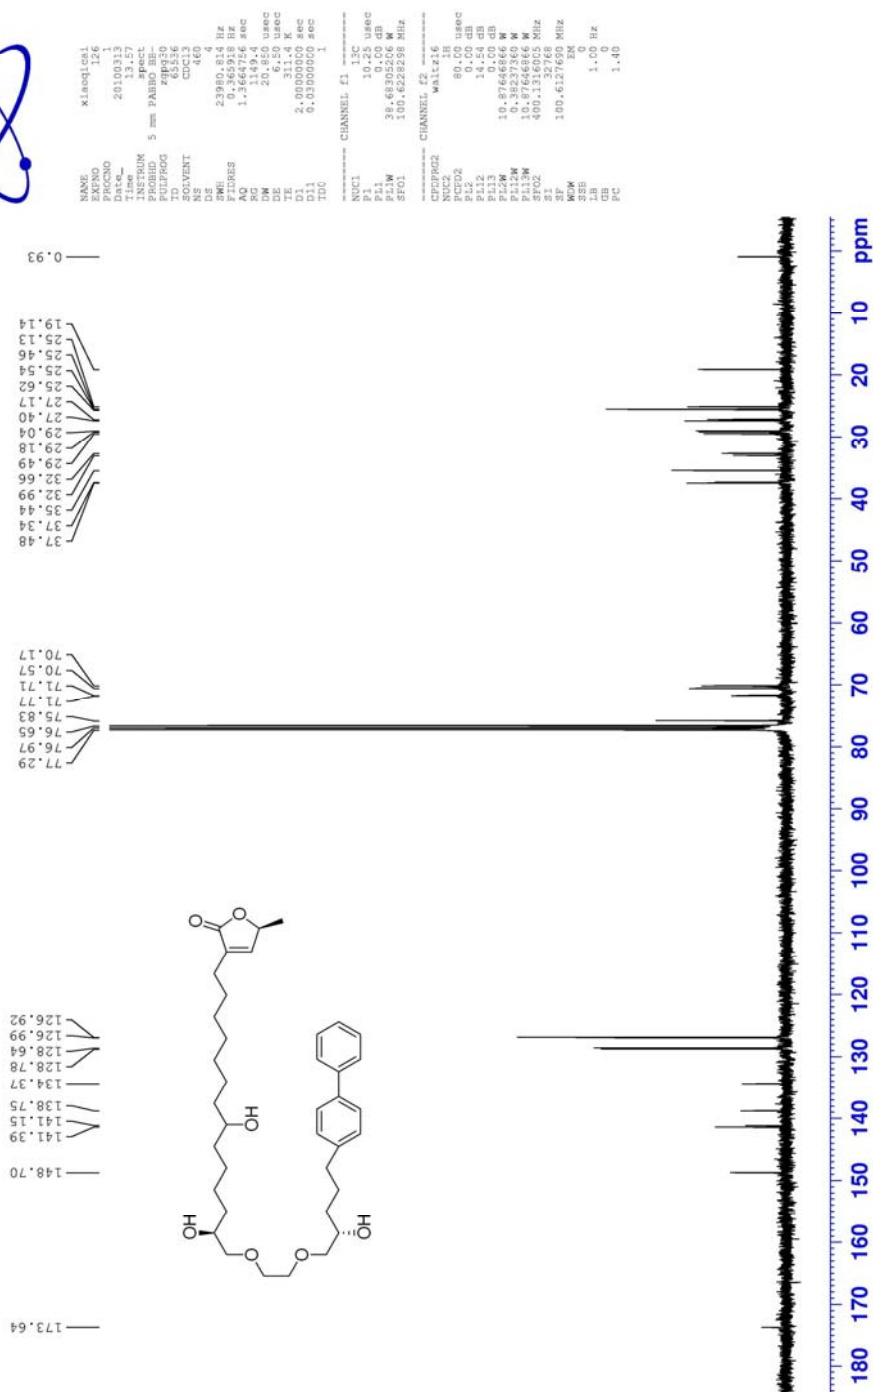

<sup>13</sup>C NMR spectra of compound 7

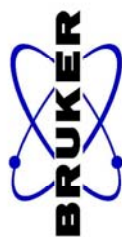

xqc47398

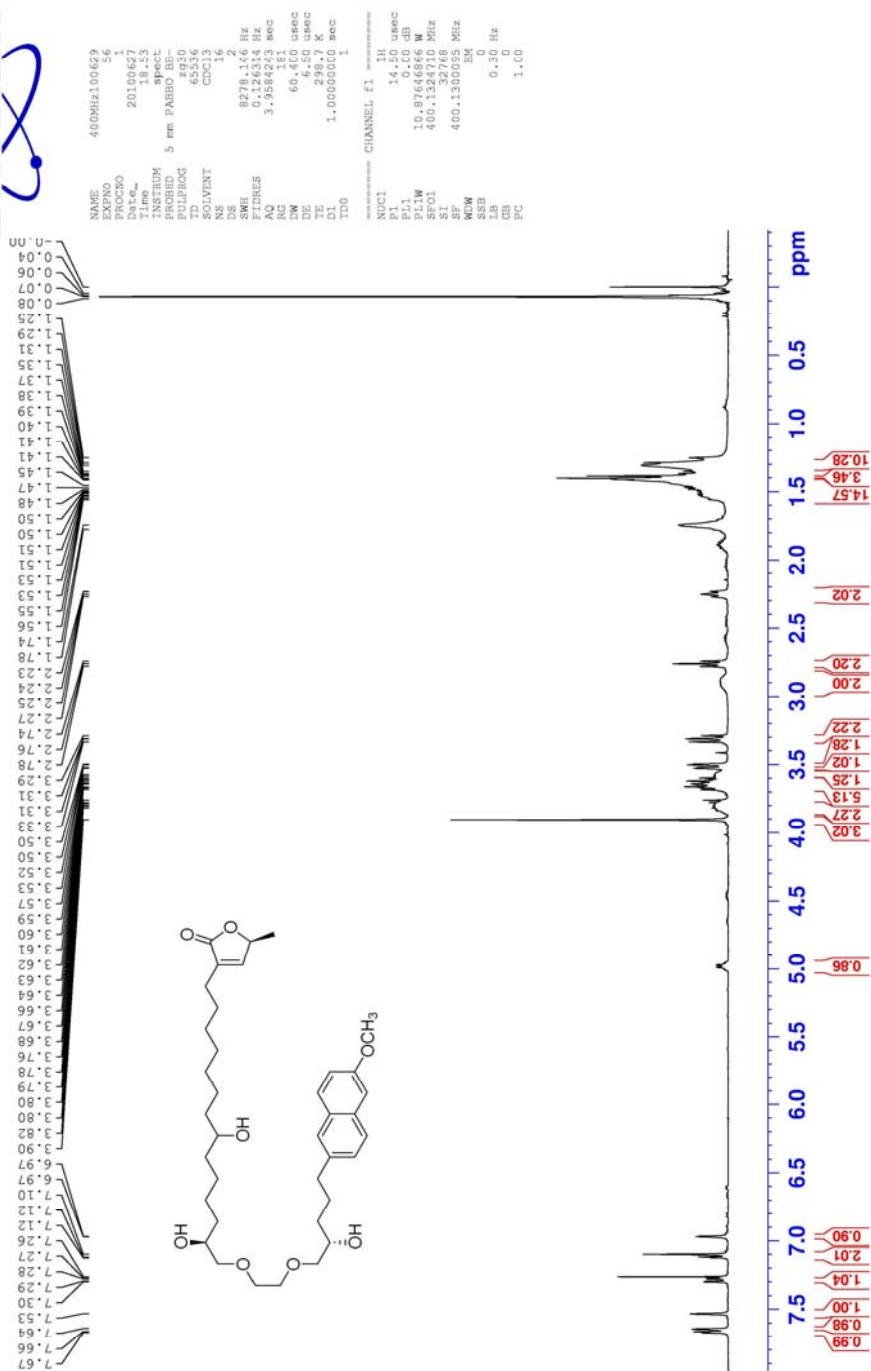

<sup>1</sup>H NMR spectra of compound 8

xqc47398

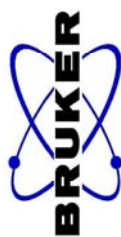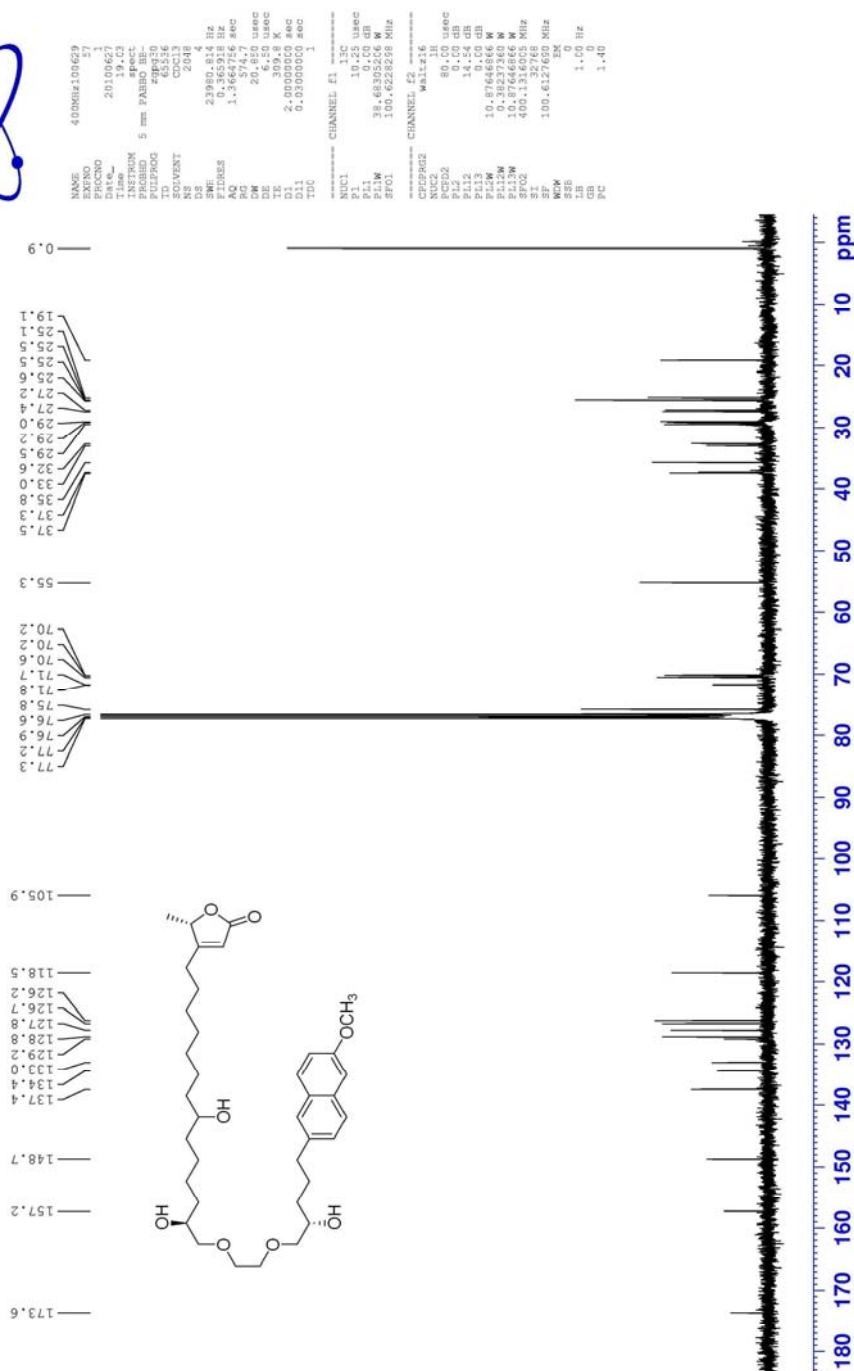

<sup>13</sup>C NMR spectra of compound 8
